# Supplementary material for: Development of a prediction model to aid primary care physicians in early identification of women at high risk of developing endometriosis: cross-sectional study
Source: PubMed Central journal article supplement — BMJ Open. 2019 Dec 4;9(12):e030346. doi: 10.1136/bmjopen-2019-030346 (PMC6924695; doi:10.1136/bmjopen-2019-030346), 2019-12-04
Supplement: bmjopen-2019-030346.draft_revisions.pdf [file bmjopen-2019-030346.draft_revisions.pdf]

# BMJ Open

BMJ Open is committed to open peer review. As part of this commitment we make the peer review history of every article we publish publicly available.

When an article is published we post the peer reviewers' comments and the authors' responses online. We also post the versions of the paper that were used during peer review. These are the versions that the peer review comments apply to.

The versions of the paper that follow are the versions that were submitted during the peer review process. They are not the versions of record or the final published versions. They should not be cited or distributed as the published version of this manuscript.

BMJ Open is an open access journal and the full, final, typeset and author-corrected version of record of the manuscript is available on our site with no access controls, subscription charges or pay-per-view fees (<http://bmjopen.bmj.com>).

If you have any questions on BMJ Open's open peer review process please email [info.bmjopen@bmj.com](mailto:info.bmjopen@bmj.com)

# BMJ Open

## Development of a prediction model to aid primary care physicians in early identification of women at high risk of developing endometriosis

|                               |                                                                                                                                                                                                                                                                                                                                                                                                                                                                                 |
|-------------------------------|---------------------------------------------------------------------------------------------------------------------------------------------------------------------------------------------------------------------------------------------------------------------------------------------------------------------------------------------------------------------------------------------------------------------------------------------------------------------------------|
| Journal:                      | <i>BMJ Open</i>                                                                                                                                                                                                                                                                                                                                                                                                                                                                 |
| Manuscript ID                 | bmjopen-2019-030346                                                                                                                                                                                                                                                                                                                                                                                                                                                             |
| Article Type:                 | Research                                                                                                                                                                                                                                                                                                                                                                                                                                                                        |
| Date Submitted by the Author: | 10-Mar-2019                                                                                                                                                                                                                                                                                                                                                                                                                                                                     |
| Complete List of Authors:     | Verket, Nina; University of Oslo, Institute of Clinical Medicine; Oslo University Hospital, Research Center for Obstetrics and Gynecology<br>Sørum Falk, Ragnhild; Oslo University Hospital, Oslo Center for Biostatistics and Epidemiology<br>Qvigstad, Erik; Oslo University Hospital, Department of Gynecology<br>Tanbo, Tom ; University of Oslo, Institute of Clinical Medicine<br>Sandvik, Leiv; Oslo University Hospital, Oslo Center for Biostatistics and Epidemiology |
| Keywords:                     | PRIMARY CARE, GYNAECOLOGY, Endometriosis                                                                                                                                                                                                                                                                                                                                                                                                                                        |
|                               |                                                                                                                                                                                                                                                                                                                                                                                                                                                                                 |

SCHOLARONE™  
Manuscripts

# Development of a prediction model to aid primary care physicians in early identification of women at high risk of developing endometriosis

## Cross-sectional anonymous postal questionnaire study

Nina Julie Verket, research fellow\*<sup>1,2</sup>, Ragnhild Sørum Falk, senior statistician<sup>3</sup>, Erik Qvigstad, senior consultant<sup>1,4</sup>, Tom Gunnar Tanbo, senior consultant<sup>1,5</sup>, Leiv Sandvik, senior statistician<sup>3</sup>

<sup>1</sup>Institute of Clinical Medicine, University of Oslo, Norway

<sup>2</sup>Research Center for Obstetrics and Gynecology, Oslo University Hospital, Norway

<sup>3</sup>Oslo Centre for Biostatistics and Epidemiology, Oslo University Hospital, Norway

<sup>4</sup>Department of Gynecology, Oslo University Hospital, Norway

<sup>5</sup>Department of Reproductive Medicine, Oslo University Hospital, Norway

Corresponding author: Nina Julie Verket, [ninaverket@gmail.com](mailto:ninaverket@gmail.com), Research Center for Obstetrics and Gynecology, Women's Division, Oslo University Hospital Ullevål, Pb 4956 Nydalen, 0424 Oslo, Norway.

## Abstract

**Objectives** To identify predictors of disease among a few factors commonly associated with endometriosis, and if successful, to combine these to develop a prediction model to aid primary care physicians in early identification of women at high risk of developing endometriosis.

**Design:** Cross-sectional anonymous postal questionnaire study.

**Setting:** Women aged 18-45 years recruited from the Norwegian Endometriosis Association and a random sample of women residing in Oslo, Norway.

**Participants:** 157 women with and 156 women without endometriosis.

**Main outcome measures:** Logistic and lasso regression analysis were performed with endometriosis as dependent variable. Predictors were identified and combined to develop a prediction model. The predictive ability of the model was evaluated by calculating area under the receiver operating characteristic curve (AUC) and positive and negative predictive values (PPV and NPV). To take into account the likelihood of skewed representativeness of the patient sample towards high symptom burden, we considered the following hypothetical prevalences of endometriosis in the general population: 0.1%, 0.5%, 1%, and 2%.

**Results:** A prediction model based on the two strongest predictors, frequent *absenteeism from school due to painful menstruations* and positive *family history of endometriosis*, demonstrated an AUC of 0.83. For the prevalences 0.1%, 0.5%, 1%, and 2%, this prediction model ascertained endometriosis with PPV equal to 2.0%, 9.4%, 17.2%, and 29.6%, respectively. NPV was at least 98% for all values considered.

**Conclusions:** The prediction model needs to be validated in future studies before use. Meanwhile, endometriosis should be considered a differential diagnosis in women with frequent absenteeism from school or work due to painful menstruations and positive family history of endometriosis.

**Trial registration:** #2011/2213/Regional Committee for Medical and Health Research Ethics, division south-eastern Norway B

## Article summary

### Strengths and limitations of this study

- The present study is the first to identify and combine predictors of endometriosis to develop a prediction model which may be used in primary care.
- A randomly selected sample from the general population was used to recruit control subjects.
- We did not have access to medical records.
- Possible recall and selection bias cannot be excluded.
- External validation is needed before model implementation.

For peer review only

## Introduction

Endometriosis is a chronic inflammatory gynecological disease with an estimated prevalence of ~5% among women of child bearing age.<sup>1 2</sup> Tissue similar to the inner lining of the uterus in aberrant locations can cause pain, most frequently painful menstruations and painful intercourse, and infertility.<sup>3</sup> Disease onset can be as early as adolescence, with disease persistence throughout reproductive age until a presumed burn out at menopause. Both disease expression and disease progression can vary markedly.<sup>2</sup> There is no cure, and symptomatic treatment can vary from occasional use of over-the-counter pain-killers to multiple extensive surgeries with adhesiolysis and organ resection or removal.<sup>4</sup> Thus, the potential consequences of early onset progressive endometriosis can be substantial and last multiple decades.<sup>5 6</sup>

Endometriosis is difficult to diagnose because painful menstruations, painful intercourse, and infertility are common among too many without endometriosis. To date, the only way of diagnosing endometriosis is visual confirmation of abnormal patches of tissue during surgery.<sup>7</sup> Thus, it is not surprising that for some it may take years before endometriosis is diagnosed, prolonging patient uncertainty and delaying treatment and care.<sup>8-10</sup> It follows from the lack of diagnostic tools that the longest delay takes place in primary care.<sup>5 11</sup>

Screening tools are often developed for screening of general populations. However, in the field of endometriosis, screening tool development has been confined to women attending secondary and tertiary gynecological surgical units or infertility clinics.<sup>12 13</sup> Even if successful, screening tools developed from such studies would not be applicable in primary care due to the requirement of specialized examinations such as ultrasound, MRI, or surgery.<sup>14</sup> In the present study we used a control group from the general population. Our objectives were to identify predictors of disease among a few factors commonly associated with endometriosis and available to physicians through medical interview, and if successful, to combine these to develop and internally validate a prediction model to aid primary care physicians in early identification of women at high risk of developing endometriosis.

## Participants and methods

### Study design and data collection

Cross-sectional data collection was performed from 2012 to 2013. A postal questionnaire for anonymous reply was sent to women with endometriosis and a random sample of women from the general population.

### Study populations

Women with endometriosis were recruited from the Norwegian Endometriosis Association. Inclusion criteria were 18-45 years of age and surgically confirmed diagnosis. In total, 162 of 375 women successfully completed and returned the questionnaire. Among these, five reported that their diagnosis had not been confirmed surgically and were excluded. Thus, 157 women with endometriosis were included, representing a response rate of 41.9%.

1  
2  
3 Following approval from the Norwegian Tax Administration, the Norwegian Civil Registry  
4 provided names and addresses of a random sample of 1500 women, aged 18-45 years, living in  
5 Oslo, Norway. Inclusion criteria were 18-45 years of age and no known diagnosis of  
6 endometriosis. In total, 159 of 1050 women successfully completed and returned the  
7 questionnaire. Although the survey included a letter asking only women without endometriosis  
8 to participate, three women reported having endometriosis and were excluded. Thus, 156 women  
9 without endometriosis were included, representing a response rate of 14.9%.

### 12 **Basic characteristics**

13 Background information included age, height, weight, and symptoms (dysmenorrhea, pelvic  
14 pain, dysuria, dyschezia, fatigue, nausea, irregular menstrual bleeding, and irregular bowel  
15 movements) experienced at any time during the four weeks prior to answering the questionnaire.  
16 For participants with endometriosis, diagnostic delay was recorded as year receiving diagnosis  
17 minus year the participant started having symptoms. Disease duration was recorded as year of  
18 data collection minus year receiving diagnosis. Further, the questionnaire included a multiple  
19 choice question on organs/anatomic locations affected by endometriosis, and two open questions  
20 inviting free description of previous and present treatment.

### 23 **Candidate predictors**

24 The following candidate predictors (with the answer alternatives given in parenthesis) were  
25 included in the questionnaire:

- 26 1. Age at menarche
- 27 2. Severe dysmenorrhea in adolescence (never/rarely/sometimes/often/always)
- 28 3. Absenteeism from school – junior high school and/or high school – due to dysmenorrhea  
29 (never/rarely/sometimes/often/always)
- 30 4. Use of painkillers due to dysmenorrhea in adolescence  
31 (never/rarely/sometimes/often/always)
- 32 5. Use of oral contraceptives due to dysmenorrhea in adolescence (yes/no)
- 33 6. Family history of endometriosis (yes/no/I don't know/irrelevant)

### 36 **Statistical analysis**

37 Data were presented as mean with standard deviation for continuous variables and as frequencies  
38 with percentages for categorical variables. Continuous variables were compared using  
39 independent samples t-test. Categorical variables were compared using Pearson's chi-squared  
40 test. Ordered categorical variables were compared using linear-by-linear association chi-squared  
41 test.

42 *Development of risk indices:* Two different approaches were used to develop two risk indices:  
43 Endometriosis Risk Index variant 1 (ERI-1) based on logistic regression analysis, and  
44 Endometriosis Risk Index variant 2 (ERI-2) based on lasso regression analysis. Logistic  
45 regression analysis is one of the most frequently used methods to develop prediction models by  
46 selecting relevant predictors and combining them statistically into a multivariable model.<sup>15</sup>  
47 However, logistic regression may overestimate performance. We therefore applied lasso  
48 regression analysis, a penalization procedure, during model development, as recommended in the  
49 TRIPOD checklist for developing and validating prediction models.<sup>15</sup> In the regression analyses,  
50  
51  
52  
53  
54  
55  
56  
57  
58  
59

1  
2  
3 the variables *age at menarche*, *severe dysmenorrhea in adolescence*, and *absenteeism from*  
4 *school due to dysmenorrhea* were considered continuous. The variable *use of painkillers due to*  
5 *dysmenorrhea in adolescence* was recoded into three categories (never/rarely, sometimes, and  
6 often/always) based on linearity of the beta coefficients. The variable *use of oral contraceptives*  
7 *due to dysmenorrhea in adolescence* was considered dichotomous (yes/no), as was *family history*  
8 *of endometriosis* (categorized as yes versus no/I don't know/irrelevant/missing). Participants  
9 with complete data for the candidate predictors (154 cases and 145 controls) were included in the  
10 analyses.  
11  
12

13  
14 First, univariable and multivariable logistic regression analysis were performed to assess the  
15 relationship between the six candidate predictors and endometriosis. Backward stepwise variable  
16 selection was performed using  $p \leq 0.157$  as criterion (corresponding to Akaike information  
17 criteria). The results were presented as beta coefficients and odds ratios with 95% confidence  
18 intervals based on 1000 bootstrap samples. ERI-1 was based on the relative ratio between the  
19 beta coefficients. Second, lasso regression analysis was performed with 10-fold cross-validation  
20 and 1000 bootstrap samples, as implemented in the R package *mami*. The results were presented  
21 as means of the lasso regression coefficients with 95% confidence intervals. ERI-2 was based on  
22 the relative ratios between the lasso regression coefficients.  
23  
24

25 *Internal validation*: The predictive abilities of the two risk indices, ERI-1 and ERI-2, were  
26 described by area under the receiver operating characteristic curve (AUC). Sensitivity and  
27 specificity for different cut-off values of the risk indices were calculated, as well as positive and  
28 negative predictive values (PPV and NPV). To take into account the likelihood of skewed  
29 representativeness of the patient sample towards high symptom burden,<sup>16</sup> we considered the  
30 following hypothetical prevalences of endometriosis in the general population: 0.1%, 0.5%, 1%,  
31 and 2%. Participants with complete data for the predictors included in ERI-1 and ERI-2 (155  
32 cases and 148 controls) were included in the analyses.  
33  
34

35 A significance level of 5% was used if not otherwise stated. All analyses were performed with  
36 IBM SPSS Statistics version 22, Stata/SE version 15, and R version 3.5.  
37  
38

### 39 **Patient and Public Involvement**

40 A representative of the Norwegian Endometriosis Association assessed readability and  
41 respondent burden of the questionnaire prior to survey administration. Patients were not  
42 consulted to interpret the results. Patients were not invited to contribute to the writing or editing  
43 of this document for readability or accuracy.  
44  
45

## 46 **Results**

### 47 **Basic characteristics of the participants**

48 Basic characteristics of the participants are presented in tables 1 and 2. All 157 participants with  
49 endometriosis reported surgically confirmed diagnosis. Of these, 123 reported previous or  
50 present affection of one or both ovaries, bladder, vagina, and/or bowels. To an open question  
51 inviting free description of previous treatment, 122 reported surgical treatment. Of these, 33  
52  
53  
54  
55  
56  
57  
58  
59  
60



reported specific surgical procedures including 18 hysterectomies, 12 oophorectomies (11 unilateral, one bilateral), five cystectomies of endometriomas, and seven partial colectomies.

Table 1 Characteristics of the participants

| Variable                                                          | Endometriosis group<br>n = 157 |         | Control group<br>n = 156 |         | p-value              |                     |
|-------------------------------------------------------------------|--------------------------------|---------|--------------------------|---------|----------------------|---------------------|
| Age (years), mean $\pm$ 1 SD                                      | 35.2 $\pm$ 6.5                 |         | 32.6 $\pm$ 6.5           |         | < 0.001 <sup>b</sup> |                     |
| BMI (kg/m <sup>2</sup> ), mean $\pm$ 1 SD                         | 24.8 $\pm$ 5.2                 |         | 23.4 $\pm$ 4.1           |         | 0.02 <sup>b</sup>    |                     |
| Dysmenorrhea <sup>a</sup> , n (%)                                 | 97                             | (71.9%) | 66                       | (43.4%) | <0.001 <sup>c</sup>  |                     |
| Pelvic pain <sup>a</sup> , n (%)                                  | 129                            | (84.9%) | 29                       | (19.2%) | <0.001 <sup>c</sup>  |                     |
| Dysuria <sup>a</sup> , n (%)                                      | 52                             | (33.8%) | 6                        | (3.9%)  | <0.001 <sup>c</sup>  |                     |
| Dyschezia <sup>a</sup> , n (%)                                    | 83                             | (53.5%) | 17                       | (11.0%) | <0.001 <sup>c</sup>  |                     |
| Fatigue <sup>a</sup> , n (%)                                      | 143                            | (91.1%) | 91                       | (59.1%) | <0.001 <sup>c</sup>  |                     |
| Nausea <sup>a</sup> , n (%)                                       | 73                             | (46.5%) | 30                       | (19.2%) | <0.001 <sup>c</sup>  |                     |
| Irregular menstrual bleeding <sup>a</sup> , n (%)                 | 45                             | (32.4%) | 22                       | (14.7%) | <0.001 <sup>c</sup>  |                     |
| Irregular bowel movements <sup>a</sup> , n (%)                    | 105                            | (68.2%) | 37                       | (24.2%) | <0.001 <sup>c</sup>  |                     |
| Age at menarche (years), mean $\pm$ 1 SD                          | 12.7 $\pm$ 1.5                 |         | 13.0 $\pm$ 1.6           |         | 0.11 <sup>b</sup>    |                     |
| Severe dysmenorrhea in adolescence, n (%)                         | Never                          | 5       | (3.2%)                   | 30      | (20.1%)              | <0.001 <sup>d</sup> |
|                                                                   | Rarely                         | 13      | (8.3%)                   | 36      | (24.2%)              |                     |
|                                                                   | Sometimes                      | 31      | (19.9%)                  | 43      | (28.9%)              |                     |
|                                                                   | Often                          | 45      | (28.8%)                  | 21      | (14.1%)              |                     |
|                                                                   | Always                         | 62      | (39.7%)                  | 19      | (12.8%)              |                     |
| Absenteeism from school due to dysmenorrhea, n (%)                | Never                          | 28      | (17.8%)                  | 99      | (66.4%)              | <0.001 <sup>d</sup> |
|                                                                   | Rarely                         | 23      | (14.6%)                  | 26      | (17.4%)              |                     |
|                                                                   | Sometimes                      | 52      | (33.1%)                  | 17      | (11.4%)              |                     |
|                                                                   | Often                          | 38      | (24.2%)                  | 5       | (3.4%)               |                     |
|                                                                   | Always                         | 16      | (10.2%)                  | 2       | (1.3%)               |                     |
| Use of painkillers for dysmenorrhea in adolescence, n (%)         | Never                          | 20      | (12.8%)                  | 56      | (37.6%)              | <0.001 <sup>d</sup> |
|                                                                   | Rarely                         | 15      | (9.6%)                   | 30      | (20.1%)              |                     |
|                                                                   | Sometimes                      | 36      | (23.1%)                  | 40      | (26.8%)              |                     |
|                                                                   | Often                          | 39      | (25.0%)                  | 10      | (6.7%)               |                     |
|                                                                   | Always                         | 46      | (29.5%)                  | 13      | (8.7%)               |                     |
| Use of oral contraceptives for dysmenorrhea in adolescence, n (%) | 60                             | (38.2%) | 17                       | (11.5%) | <0.001 <sup>c</sup>  |                     |
| Family history of endometriosis, n (%)                            | 42                             | (26.8%) | 7                        | (4.5%)  | <0.001 <sup>c</sup>  |                     |

<sup>a</sup> Experienced at any time during the 4 weeks prior to answering the questionnaire. <sup>b</sup> Independent samples t-test. <sup>c</sup> Pearson's chi-squared test. <sup>d</sup> Linear-by-linear association chi-squared test. Because of missing values, the calculated percentages may not refer to the total number of participants.

Table 2 Further characteristics of the endometriosis group

|                                                             |               |
|-------------------------------------------------------------|---------------|
| <b>Diagnostic delay (years), mean <math>\pm</math> 1 SD</b> | 8.1 $\pm$ 6.5 |
| <b>Disease duration (years), mean <math>\pm</math> 1 SD</b> | 6.6 $\pm$ 5.0 |
| <b>Diagnosis confirmed by surgery</b>                       | 100%          |
| <b>Organ affected <sup>a</sup> (n = 148)</b>                |               |
| Only peritoneum, n (%)                                      | 10 (6.8%)     |
| Ovaries, n (%)                                              | 98 (66.2%)    |
| Bladder, n (%)                                              | 36 (24.3%)    |
| Vagina, n (%)                                               | 28 (18.9%)    |
| Bowels, n (%)                                               | 54 (36.5%)    |
| <b>Previous treatment <sup>b</sup> (n = 146)</b>            |               |
| Analgesic, n (%)                                            | 17 (11.6%)    |
| Hormonal, n (%)                                             | 85 (58.2%)    |
| Surgical, n (%)                                             | 122 (83.6%)   |
| <b>Present treatment <sup>b</sup> (n= 138)</b>              |               |
| No treatment, n (%)                                         | 45 (32.6%)    |
| Receiving treatment, n (%)                                  | 93 (67.4%)    |
| Analgesic, n (%)                                            | 28 (30.1%)    |
| Hormonal n (%)                                              | 73 (78.5%)    |
| Awaiting surgery, n (%)                                     | 4 (2.9%)      |

<sup>a</sup> Multiple choice question. <sup>b</sup> Open question inviting free description.

### Candidate predictors

Responses to the candidate predictors are presented in table 1. Regarding family history of endometriosis in the endometriosis group, 42 participants reported positive family history, 102 negative family history, seven answered “I don’t know”, five “irrelevant”, and one did not answer at all. Of the 42 who reported positive family history, 41 specified nature of kinship (reporting one to three relatives each). 19 reported a mother, 13 a sister, nine one or more aunts, four a grandmother, three a cousin, two parent’s cousin, one a niece, and one a great aunt. In total, 28 of 41 (68.3%) reported one or more first-degree relatives with endometriosis. In the control group, seven participants reported positive family history and 126 negative family history. None of the participants answered “I don’t know”, eight answered “irrelevant”, and 15 did not answer at all. Of the seven who reported positive family history, six reported one or more sisters, one a mother, and one a cousin. All seven reported one or more first-degree relatives with endometriosis.

### Development of Endometriosis Risk Index variant 1 using logistic regression analysis

Based on univariable logistic regression analysis, *use of painkillers due to dysmenorrhea in adolescence, family history of endometriosis, use of oral contraceptives due to dysmenorrhea in adolescence, absenteeism from school due to dysmenorrhea, and severe dysmenorrhea in adolescence* were the strongest predictors of endometriosis (table 3). Multivariable logistic regression analysis with backward stepwise variable selection procedure resulted in two

predictors: *absenteeism from school due to dysmenorrhea* (A), and *family history of endometriosis* (F). Based on the relative ratio between the beta coefficients (A : F ratio was 1.1 : 2.3, rounded to 1 : 2), the following risk index was developed and assigned scores from 0 to 6:

ERI-1 = A + 2F, where

- A = Absenteeism from school due to dysmenorrhea (never = 0 points, rarely = 1 point, sometimes = 2 points, often = 3 points, always = 4 points)
- F = Family history of endometriosis (yes = 1 point, not yes = 0 points).

### Development of Endometriosis Risk Index variant 2 using lasso regression analysis

Based on lasso regression analysis, four predictors were selected: *severe dysmenorrhea in adolescence*, *absenteeism from school due to dysmenorrhea*, *use of painkillers due to dysmenorrhea in adolescence* (the categories often or always), and *family history of endometriosis* (table 3). Based on the relative ratios between the means of the lasso regression coefficients, the following risk index was developed and assigned scores from 0 to 44:

ERI-2 = D + 6A + 2P + 14F, where

- D: Severe Dysmenorrhea in adolescence (never = 0 points, rarely = 1 point, sometimes = 2 points, often = 3 points, always = 4 points).
- A: Absenteeism from school due to dysmenorrhea (never = 0 points, rarely = 1 point, sometimes = 2 points, often = 3 points, always = 4 points).
- P: Use of Painkillers due to dysmenorrhea in adolescence (never/rarely/sometimes = 0 points, often/always = 1 point).
- F: Family history of endometriosis (yes = 1 point, not yes = 0 points).

Table 3 Logistic and lasso regression analyses of candidate predictors of endometriosis

| Candidate predictors                                | Univariable logistic regression |                 | Multivariable logistic regression |                 | Logistic regression with backward stepwise selection <sup>c</sup> |                 | Lasso regression |              |
|-----------------------------------------------------|---------------------------------|-----------------|-----------------------------------|-----------------|-------------------------------------------------------------------|-----------------|------------------|--------------|
|                                                     | B                               | OR (95%CI)      | B                                 | OR (95% CI)     | B                                                                 | OR (95% CI)     | B                | (95% CI)     |
| <i>Intercept</i>                                    |                                 |                 | -2.6                              | 0.1 (0.0, 0.9)  | -1.5                                                              | 0.2 (0.1, 0.3)  | -1.5             | (-4.3, -0.5) |
| Age at menarche (years)                             | -0.1                            | 0.9 (0.8, 1.0)  | 0.1                               | 1.1 (0.9, 1.3)  |                                                                   |                 |                  |              |
| Severe dysmenorrhea <sup>a</sup> (cont.)            | 0.8                             | 2.2 (1.8, 2.8)  | 0.2                               | 1.2 (0.9, 1.8)  |                                                                   |                 | 0.1              | (0.0, 0.5)   |
| Absenteeism from school <sup>b</sup> (cont.)        | 1.1                             | 3.0 (2.2, 3.9)  | 0.9                               | 2.5 (1.6, 3.7)  | 1.1                                                               | 3.0 (2.3, 4.1)  | 0.8              | (0.5, 1.2)   |
| Use of painkillers <sup>b</sup> (ref. never/rarely) |                                 |                 |                                   |                 |                                                                   |                 |                  |              |
| Sometimes                                           | 0.9                             | 2.3 (1.2, 4.5)  | -0.2                              | 0.8 (0.4, 2.0)  |                                                                   |                 |                  |              |
| Often/Always                                        | 2.3                             | 9.8 (5.2, 18.7) | 0.2                               | 1.3 (0.5, 3.5)  |                                                                   |                 | 0.3              | (0.0, 1.0)   |
| Use of oral contraceptives <sup>b</sup>             | 1.6                             | 4.8 (2.6, 8.8)  | 0.1                               | 1.1 (0.5, 2.6)  |                                                                   |                 |                  |              |
| Family history of endometriosis                     | 2.2                             | 8.7 (3.2, 23.5) | 2.2                               | 9.4 (2.9, 30.6) | 2.3                                                               | 9.5 (3.1, 29.2) | 1.7              | (1.0, 3.0)   |

Only participants with complete data for the candidate predictors (154 cases and 145 controls) were included in the analyses. OR: Odds ratio. CI: Confidence interval based on 1000 bootstrap samples. cont.: Continuous. <sup>a</sup> Experienced in adolescence. <sup>b</sup> Due to dysmenorrhea in adolescence. <sup>c</sup> Backward stepwise variable selection was performed using Wald test statistics  $p \leq 0.157$  as the criterion for inclusion.

### Internal validation

The AUC was 0.83 and 0.85 for ERI-1 and ERI-2, respectively. Sensitivities and specificities for different cut-off values for ERI-1 and ERI-2 are presented in table 4 and 5. Estimated specificities for ERI-1 with cut-off  $\geq 5$  (ERI-1  $\geq 5$ ) and ERI-2 with cut-off  $\geq 33$  (ERI-2  $\geq 33$ ) were 100%. As a true specificity of 100% is highly unlikely, we chose a value of 99.5% when calculating PPV for ERI-1  $\geq 5$  and ERI-2  $\geq 33$ .

For each hypothetical prevalence, PPV and NPV were calculated for ERI-1 cut-off values 2, 3, 4, and 5 (table 4), and for ERI-2 cut-off values 12, 19, 26, and 33 (table 5). The highest cut-off value provided the highest PPV. For the prevalences 0.1%, 0.5%, 1%, and 2%, both prediction models “ERI-1  $\geq 5$ ” (score range 0-6) and “ERI-2  $\geq 33$ ” (score range 0-44) ascertained endometriosis with PPV equal to 2.0%, 9.4%, 17.2%, and 29.6%, respectively. For both indices, PPV was low for the cut-off value that provided the highest sensitivity. NPV was at least 98% for all values considered (table 4 and 5). In the present dataset, 16 of 155 participants with endometriosis achieved ERI-1  $\geq 5$  and ERI-2  $\geq 33$ . Among participants without endometriosis, the highest achieved ERI-1 and ERI-2 scores were 4 and 32, respectively.

Table 4 Positive and negative predictive value for Endometriosis Risk Index variant 1 (score range 0-6) with cut-off values 2, 3, 4, and 5, for different possible prevalences of endometriosis

| Possible prevalences | ERI-1 $\geq 2$                         |        | ERI-1 $\geq 3$                         |       | ERI-1 $\geq 4$                         |       | ERI-1 $\geq 5$                          |       |
|----------------------|----------------------------------------|--------|----------------------------------------|-------|----------------------------------------|-------|-----------------------------------------|-------|
|                      | Sensitivity 76.8%<br>Specificity 79.7% |        | Sensitivity 45.2%<br>Specificity 92.6% |       | Sensitivity 24.5%<br>Specificity 98.0% |       | Sensitivity 10.3%<br>Specificity 100.0% |       |
|                      | PPV                                    | NPV    | PPV                                    | NPV   | PPV                                    | NPV   | PPV                                     | NPV   |
| 2.0%                 | 7.2%                                   | 99.4%  | 11.1%                                  | 98.8% | 20.0%                                  | 98.5% | 29.6% <sup>a</sup>                      | 98.2% |
| 1.0%                 | 3.7%                                   | 99.7%  | 5.8%                                   | 99.4% | 11.0%                                  | 99.2% | 17.2% <sup>a</sup>                      | 99.1% |
| 0.5%                 | 1.9%                                   | 99.9%  | 3.0%                                   | 99.7% | 5.8%                                   | 99.6% | 9.4% <sup>a</sup>                       | 99.5% |
| 0.1%                 | 0.4%                                   | 100.0% | 0.6%                                   | 99.9% | 1.2%                                   | 99.9% | 2.0% <sup>a</sup>                       | 99.9% |

Only participants with complete data for the predictors included in Endometriosis Risk Index variant 1 and 2 (155 cases and 148 controls) were included in the analyses. ERI-1: Endometriosis Risk Index variant 1. PPV: Positive predictive value. NPV: Negative predictive value. <sup>a</sup> PPV for ERI-1 cut-off  $\geq 5$  was calculated using specificity 99.5%, not 100.0%

Table 5 Positive and negative predictive value for Endometriosis Risk Index variant 2 (score range 0-44) with cut-off values 12, 19, 26, and 33, for different possible prevalences of endometriosis

| Possible prevalences | ERI-2 $\geq$ 12 |        | ERI-2 $\geq$ 19 |       | ERI-2 $\geq$ 26 |       | ERI-2 $\geq$ 33    |       |
|----------------------|-----------------|--------|-----------------|-------|-----------------|-------|--------------------|-------|
|                      | PPV             | NPV    | PPV             | NPV   | PPV             | NPV   | PPV                | NPV   |
| 2.0%                 | 7.3%            | 99.4%  | 11.1%           | 98.8% | 20.0%           | 98.5% | 29.6% <sup>a</sup> | 98.2% |
| 1.0%                 | 3.7%            | 99.7%  | 5.8%            | 99.4% | 11.0%           | 99.2% | 17.2% <sup>a</sup> | 99.1% |
| 0.5%                 | 1.9%            | 99.9%  | 3.0%            | 99.7% | 5.8%            | 99.6% | 9.4% <sup>a</sup>  | 99.5% |
| 0.1%                 | 0.4%            | 100.0% | 0.6%            | 99.9% | 1.2%            | 99.9% | 2.0% <sup>a</sup>  | 99.9% |

Only participants with complete data for the predictors included in Endometriosis Risk Index variant 1 and 2 (155 cases and 148 controls) were included in the analyses. ERI-2: Endometriosis Risk Index variant 2. PPV: Positive predictive value. NPV: Negative predictive value. <sup>a</sup> PPV for ERI-2 cut-off  $\geq$  33 was calculated using specificity 99.5%, not 100.0%

## Discussion

### Statement of principal findings

In the present study, regression analysis was used to develop two endometriosis risk indices. The predictors *absenteeism from school due to dysmenorrhea* and *family history of endometriosis* demonstrated the strongest association with disease. Endometriosis Risk Index variant 1 (ERI-1) included these two predictors only. Endometriosis Risk Index variant 2 (ERI-2) included two more: *severe dysmenorrhea in adolescence* and *use of painkillers due to dysmenorrhea in adolescence*. However, these two predictors had the lowest weight among the predictors included in ERI-2. For the hypothetical prevalences of endometriosis in the general population 0.1%, 0.5%, 1%, and 2%, both prediction models “ERI-1  $\geq$  5” (score range 0-6) and “ERI-2  $\geq$  33” (score range 0-44) ascertained endometriosis with PPV equal to 2.0%, 9.4%, 17.2%, and 29.6%, respectively, and NPV was at least 98% for all values considered. Thus, no apparent additional value was observed for ERI-2 relative to ERI-1. Similar predictive properties may advocate proceeding with the simplest model, “ERI-1  $\geq$  5”.

### Strengths and weaknesses of the study

A major strength of the present study is that it is the first to identify predictors of endometriosis which may be used in primary care. When developing prediction models, high positive predictive value (PPV) is preferable to high sensitivity and specificity. Thus, cut-off values for the risk indices providing the highest PPV were chosen. Depending on the prevalence, the prediction models may identify women at high risk of developing endometriosis with PPVs comparable to that of mammography screening, where PPVs close to 15% are common.<sup>17</sup> However, a sensitivity close to 10% is lower than we would prefer. Still, our patient sample has previously been demonstrated to carry a high disease burden, with marked pain and low health-related quality of life, comparable to or worse than women with rheumatoid arthritis, but with the disease hitting them at a much younger age.<sup>16</sup> Thus, we have a patient sample representing a subtype of endometriosis that would undoubtedly benefit from early diagnosis and treatment. Hence, a screening tool with a sensitivity of 10% seems much better than the alternative of no

1  
2  
3 screening tool. Cut-offs giving a sensitivity and specificity of ~80%, provided an unacceptable  
4 PPV of ~3%.  
5

6  
7 Our study has several weaknesses. First, we did not have access to medical records. Thus,  
8 severity of endometriosis could not be assessed. A second weakness is that we cannot exclude  
9 the possibility of recall bias. Women with endometriosis may be more liable to recall symptoms  
10 suggestive of endometriosis experienced in adolescence compared with women without  
11 endometriosis. A third weakness is the low response rate from the general population, following  
12 an overall international trend of declining response rates to postal surveys.<sup>18</sup> Thus, the control  
13 group may not be completely randomly selected even though random procedures were used for  
14 selection. However, the prevalences of *absenteeism from school due to dysmenorrhea* and *family*  
15 *history of endometriosis* in the control group in the present study, were comparable to those  
16 found in a Finnish survey involving 1103 adolescent girls from the general population, in which  
17 2.7% reported having a first degree relative with endometriosis, and 5% reported regular  
18 absenteeism from school or voluntary activities because of painful menstruation.<sup>19</sup>  
19  
20

### 21 **Comparison with other studies**

22 Previous studies on screening tool development have not included control groups from the  
23 general population and have not been intended for use in primary care settings, making  
24 comparisons of findings difficult.<sup>12 13 20-22</sup> In general, reporting of pain, such as frequency of  
25 dysmenorrhea, is subject to substantial individual variation and expected to be of limited  
26 predictive value. However, interference of pain with daily life, such as absenteeism from school  
27 due to dysmenorrhea, is less common and likely less subject to individual variation. The choice  
28 of the response options “never”, “rarely”, “sometimes”, “often”, and “always” to the question on  
29 frequency of absenteeism from school, although seldom used in other studies, has most likely  
30 been suitable. Endometriosis has an estimated total heritability of about 50%.<sup>23 24</sup> It is therefore  
31 not surprising that a positive family history of endometriosis is required for both prediction  
32 models to identify women at high risk of developing endometriosis.  
33  
34  
35

36 The predictors identified in the current study are in line with a French study, however more so  
37 for advanced endometriosis than for endometriosis in general.<sup>25</sup> In a cross-sectional study  
38 comparing adolescent markers among women with endometriosis, women with deeply  
39 infiltrating endometriosis were found to have a more positive family history of endometriosis  
40 (OR 3.2) and higher absenteeism from school during menstruation (OR 1.7), than women with  
41 superficial peritoneal endometriosis and/or ovarian endometriomas.<sup>25</sup> In a genome-wide  
42 association study regarding heredity of endometriosis, moderate and severe endometriosis  
43 showed greater genetic burden than minimal or mild endometriosis.<sup>26</sup> Thus, our models may be  
44 more predictive of advanced endometriosis than of endometriosis in general. The prevalence of  
45 deep endometriosis is assumed to be ~2%,<sup>2 27</sup> which may be a bit overstated according to some  
46 prevalence studies.<sup>28-31</sup> Thus, the chosen range of hypothetical prevalences in the present study  
47 seems appropriate.  
48  
49  
50

### 51 **Future research**

52 More studies on screening tool development for endometriosis including control groups from the  
53 general population are needed. Register studies should be encouraged. However, newer  
54 candidate predictors such as absenteeism from school due to dysmenorrhea with suitable  
55  
56  
57  
58  
59  
60

1  
2  
3 response options may not always be available. In view of the diversity of endometriosis, different  
4 subtypes may require different prediction models.  
5

### 6 **Conclusions and clinical implications**

7 The developed prediction models need to be validated in future studies before use. Meanwhile,  
8 endometriosis should be considered a differential diagnosis in women with frequent absenteeism  
9 from school or work due to dysmenorrhea and positive family history of endometriosis.  
10 Persevering or increasing interference of pain with daily life should prompt referral to secondary  
11 or tertiary care clinics experienced in handling endometriosis patients.  
12  
13  
14  
15

### 16 **Acknowledgements**

17  
18 We gratefully acknowledge the contribution of Karen Bertelsen of the Norwegian Endometriosis  
19 Association and the association itself.  
20  
21  
22

### 23 **Contributors**

24  
25 Study concept and design: NJV, RSF, LS. Acquisition of data: NJV. Analysis and interpretation  
26 of data: NJV, RSF, EQ, TGT, LS. Drafting of manuscript: NJV, RSF, LS. The final manuscript  
27 was critically revised and approved by all authors.  
28  
29  
30

### 31 **Funding**

32  
33 The present study was funded by the University of Oslo.  
34  
35  
36

### 37 **Competing interests**

38  
39 None declared.  
40  
41  
42

### 43 **Ethics approval**

44  
45 The study was approved by the Regional Committee for Medical and Health Research Ethics,  
46 division south-eastern Norway (trial registration number: 2011/2213/Regional Committee for  
47 Medical and Health Research Ethics, division south-eastern Norway B).  
48  
49  
50

### 51 **Data Sharing Statement**

The data used in the present study is part of a larger dataset. Due to ongoing data analysis, the data used in the present study will not be available until all data analysis is completed. The corresponding author can be contacted for details.

## Dissemination declaration

We aim to disseminate the results in the Norwegian Endometriosis Association newsletter. If the prediction models are validated, primary care physicians will be informed through national health care and primary care physician websites. School nurses will be informed through school nurse networks, including presentation at the annual national school nurse conference.

## References

1. Fuldeore MJ, Soliman AM. Prevalence and Symptomatic Burden of Diagnosed Endometriosis in the United States: National Estimates from a Cross-Sectional Survey of 59,411 Women. *Gynecol Obstet Invest* 2017;82(5):453-61. doi: 10.1159/000452660 [published Online First: 2016/11/08]
2. Zondervan KT, Becker CM, Koga K, et al. Endometriosis. *Nat Rev Dis Primers* 2018;4(1):9. doi: 10.1038/s41572-018-0008-5 [published Online First: 2018/07/22]
3. Vercellini P, Vigano P, Somigliana E, et al. Endometriosis: pathogenesis and treatment. *Nat Rev Endocrinol* 2014;10(5):261-75. doi: 10.1038/nrendo.2013.255
4. Giudice LC. Clinical practice. Endometriosis. *N Engl J Med* 2010;362(25):2389-98. doi: 10.1056/NEJMc1000274
5. Nnoaham KE, Hummelshoj L, Webster P, et al. Impact of endometriosis on quality of life and work productivity: a multicenter study across ten countries. *Fertil Steril* 2011;96(2):366-73. doi: 10.1016/j.fertnstert.2011.05.090
6. De Graaff AA, D'Hooghe TM, Dunselman GA, et al. The significant effect of endometriosis on physical, mental and social wellbeing: results from an international cross-sectional survey. *Hum Reprod* 2013;28(10):2677-85. doi: 10.1093/humrep/det284
7. Nisenblat V, Prentice L, Bossuyt PM, et al. Combination of the non-invasive tests for the diagnosis of endometriosis. *Cochrane Database Syst Rev* 2016;7:CD012281. doi: 10.1002/14651858.CD012281
8. Husby GK, Haugen RS, Moen MH. Diagnostic delay in women with pain and endometriosis. *Acta Obstet Gynecol Scand* 2003;82(7):649-53.
9. Matsuzaki S, Canis M, Pouly JL, et al. Relationship between delay of surgical diagnosis and severity of disease in patients with symptomatic deep infiltrating endometriosis. *Fertil Steril* 2006;86(5):1314-6; discussion 17. doi: 10.1016/j.fertnstert.2006.03.048
10. Hudelist G, Fritzer N, Thomas A, et al. Diagnostic delay for endometriosis in Austria and Germany: causes and possible consequences. *Hum Reprod* 2012;27(12):3412-6. doi: 10.1093/humrep/des316
11. Staal AH, van der Zanden M, Nap AW. Diagnostic Delay of Endometriosis in the Netherlands. *Gynecol Obstet Invest* 2016;81(4):321-4. doi: 10.1159/000441911



12. Calhaz-Jorge C, Mol BW, Nunes J, et al. Clinical predictive factors for endometriosis in a Portuguese infertile population. *Hum Reprod* 2004;19(9):2126-31. doi: 10.1093/humrep/deh374
13. Nnoaham KE, Hummelshoj L, Kennedy SH, et al. Developing symptom-based predictive models of endometriosis as a clinical screening tool: results from a multicenter study. *Fertil Steril* 2012;98(3):692-701 e5. doi: 10.1016/j.fertnstert.2012.04.022
14. Surrey E, Carter CM, Soliman AM, et al. Patient-completed or symptom-based screening tools for endometriosis: a scoping review. *Arch Gynecol Obstet* 2017;296(2):153-65. doi: 10.1007/s00404-017-4406-9
15. Collins GS, Reitsma JB, Altman DG, et al. Transparent reporting of a multivariable prediction model for individual prognosis or diagnosis (TRIPOD): the TRIPOD statement. *BMJ* 2015;350:g7594. doi: 10.1136/bmj.g7594 [published Online First: 2015/01/09]
16. Verket NJ, Uhlig T, Sandvik L, et al. Health-related quality of life in women with endometriosis, compared with the general population and women with rheumatoid arthritis. *Acta Obstet Gynecol Scand* 2018;97(11):1339-48. doi: 10.1111/aogs.13427 [published Online First: 2018/07/15]
17. Domingo L, Hofvind S, Hubbard RA, et al. Cross-national comparison of screening mammography accuracy measures in U.S., Norway, and Spain. *Eur Radiol* 2016;26(8):2520-8. doi: 10.1007/s00330-015-4074-8
18. Morton LM, Cahill J, Hartge P. Reporting participation in epidemiologic studies: a survey of practice. *Am J Epidemiol* 2006;163(3):197-203. doi: 10.1093/aje/kwj036 [published Online First: 2005/12/13]
19. Suvitie PA, Hallamaa MK, Matomaki JM, et al. Prevalence of Pain Symptoms Suggestive of Endometriosis Among Finnish Adolescent Girls (TEENMAPS Study). *J Pediatr Adolesc Gynecol* 2016;29(2):97-103. doi: 10.1016/j.jpag.2015.07.001
20. Chapron C, Barakat H, Fritel X, et al. Presurgical diagnosis of posterior deep infiltrating endometriosis based on a standardized questionnaire. *Hum Reprod* 2005;20(2):507-13. doi: 10.1093/humrep/deh627
21. Ballard K, Lane H, Hudelist G, et al. Can specific pain symptoms help in the diagnosis of endometriosis? A cohort study of women with chronic pelvic pain. *Fertil Steril* 2010;94(1):20-7. doi: 10.1016/j.fertnstert.2009.01.164
22. Lafay Pillet MC, Huchon C, Santulli P, et al. A clinical score can predict associated deep infiltrating endometriosis before surgery for an endometrioma. *Hum Reprod* 2014;29(8):1666-76. doi: 10.1093/humrep/deu128
23. Treloar SA, O'Connor DT, O'Connor VM, et al. Genetic influences on endometriosis in an Australian twin sample. *sueT@qimr.edu.au. Fertil Steril* 1999;71(4):701-10.
24. Saha R, Pettersson HJ, Svedberg P, et al. Heritability of endometriosis. *Fertil Steril* 2015;104(4):947-52. doi: 10.1016/j.fertnstert.2015.06.035 [published Online First: 2015/07/26]
25. Chapron C, Lafay-Pillet MC, Monceau E, et al. Questioning patients about their adolescent history can identify markers associated with deep infiltrating endometriosis. *Fertil Steril* 2011;95(3):877-81. doi: 10.1016/j.fertnstert.2010.10.027
26. Sapkota Y, Attia J, Gordon SD, et al. Genetic burden associated with varying degrees of disease severity in endometriosis. *Mol Hum Reprod* 2015;21(7):594-602. doi: 10.1093/molehr/gav021

- 1  
2  
3 27. Koninckx PR, Ussia A, Adamyan L, et al. Deep endometriosis: definition, diagnosis, and  
4 treatment. *Fertil Steril* 2012;98(3):564-71. doi: 10.1016/j.fertnstert.2012.07.1061  
5  
6 28. Moen MH, Schei B. Epidemiology of endometriosis in a Norwegian county. *Acta Obstet*  
7 *Gynecol Scand* 1997;76(6):559-62.  
8  
9 29. Abbas S, Ihle P, Koster I, et al. Prevalence and incidence of diagnosed endometriosis and  
10 risk of endometriosis in patients with endometriosis-related symptoms: findings from a  
11 statutory health insurance-based cohort in Germany. *Eur J Obstet Gynecol Reprod Biol*  
12 2012;160(1):79-83. doi: 10.1016/j.ejogrb.2011.09.041  
13  
14 30. von Theobald P, Cottenet J, Iacobelli S, et al. Epidemiology of Endometriosis in France: A  
15 Large, Nation-Wide Study Based on Hospital Discharge Data. *Biomed Res Int*  
16 2016;2016:3260952. doi: 10.1155/2016/3260952  
17  
18 31. Eisenberg VH, Weil C, Chodick G, et al. Epidemiology of endometriosis: a large population-  
19 based database study from a healthcare provider with 2 million members. *BJOG*  
20 2018;125(1):55-62. doi: 10.1111/1471-0528.14711 [published Online First: 2017/04/27]  
21  
22  
23  
24  
25  
26  
27  
28  
29  
30  
31  
32  
33  
34  
35  
36  
37  
38  
39  
40  
41  
42  
43  
44  
45  
46  
47  
48  
49  
50  
51  
52  
53  
54  
55  
56  
57  
58  
59  
60

## TRIPOD Checklist: Prediction Model Development

| Section/Topic                | Item | Checklist Item                                                                                                                                                                                        | Page  |
|------------------------------|------|-------------------------------------------------------------------------------------------------------------------------------------------------------------------------------------------------------|-------|
| <b>Title and abstract</b>    |      |                                                                                                                                                                                                       |       |
| Title                        | 1    | Identify the study as developing and/or validating a multivariable prediction model, the target population, and the outcome to be predicted.                                                          | 1     |
| Abstract                     | 2    | Provide a summary of objectives, study design, setting, participants, sample size, predictors, outcome, statistical analysis, results, and conclusions.                                               | 2     |
| <b>Introduction</b>          |      |                                                                                                                                                                                                       |       |
| Background and objectives    | 3a   | Explain the medical context (including whether diagnostic or prognostic) and rationale for developing or validating the multivariable prediction model, including references to existing models.      | 4     |
|                              | 3b   | Specify the objectives, including whether the study describes the development or validation of the model or both.                                                                                     | 4     |
| <b>Methods</b>               |      |                                                                                                                                                                                                       |       |
| Source of data               | 4a   | Describe the study design or source of data (e.g., randomized trial, cohort, or registry data), separately for the development and validation data sets, if applicable.                               | 4     |
|                              | 4b   | Specify the key study dates, including start of accrual; end of accrual; and, if applicable, end of follow-up.                                                                                        | 4     |
| Participants                 | 5a   | Specify key elements of the study setting (e.g., primary care, secondary care, general population) including number and location of centres.                                                          | 4-5   |
|                              | 5b   | Describe eligibility criteria for participants.                                                                                                                                                       | 4-5   |
|                              | 5c   | Give details of treatments received, if relevant.                                                                                                                                                     |       |
| Outcome                      | 6a   | Clearly define the outcome that is predicted by the prediction model, including how and when assessed.                                                                                                | 4-6   |
|                              | 6b   | Report any actions to blind assessment of the outcome to be predicted.                                                                                                                                | NR    |
| Predictors                   | 7a   | Clearly define all predictors used in developing or validating the multivariable prediction model, including how and when they were measured.                                                         | 5     |
|                              | 7b   | Report any actions to blind assessment of predictors for the outcome and other predictors.                                                                                                            | NR    |
| Sample size                  | 8    | Explain how the study size was arrived at.                                                                                                                                                            | NA    |
| Missing data                 | 9    | Describe how missing data were handled (e.g., complete-case analysis, single imputation, multiple imputation) with details of any imputation method.                                                  | 6     |
| Statistical analysis methods | 10a  | Describe how predictors were handled in the analyses.                                                                                                                                                 | 5-6   |
|                              | 10b  | Specify type of model, all model-building procedures (including any predictor selection), and method for internal validation.                                                                         | 5-6   |
|                              | 10d  | Specify all measures used to assess model performance and, if relevant, to compare multiple models.                                                                                                   | 5-6   |
| Risk groups                  | 11   | Provide details on how risk groups were created, if done.                                                                                                                                             | NR    |
| <b>Results</b>               |      |                                                                                                                                                                                                       |       |
| Participants                 | 13a  | Describe the flow of participants through the study, including the number of participants with and without the outcome and, if applicable, a summary of the follow-up time. A diagram may be helpful. | 6-8   |
|                              | 13b  | Describe the characteristics of the participants (basic demographics, clinical features, available predictors), including the number of participants with missing data for predictors and outcome.    | 6-8   |
| Model development            | 14a  | Specify the number of participants and outcome events in each analysis.                                                                                                                               | 8-9   |
|                              | 14b  | If done, report the unadjusted association between each candidate predictor and outcome.                                                                                                              | 9     |
| Model specification          | 15a  | Present the full prediction model to allow predictions for individuals (i.e., all regression coefficients, and model intercept or baseline survival at a given time point).                           | 8-9   |
|                              | 15b  | Explain how to use the prediction model.                                                                                                                                                              | 8-9   |
| Model performance            | 16   | Report performance measures (with CIs) for the prediction model.                                                                                                                                      | 10-11 |
| <b>Discussion</b>            |      |                                                                                                                                                                                                       |       |
| Limitations                  | 18   | Discuss any limitations of the study (such as nonrepresentative sample, few events per predictor, missing data).                                                                                      | 11-12 |
| Interpretation               | 19b  | Give an overall interpretation of the results, considering objectives, limitations, and results from similar studies, and other relevant evidence.                                                    | 11-13 |
| Implications                 | 20   | Discuss the potential clinical use of the model and implications for future research.                                                                                                                 | 12-13 |
| <b>Other information</b>     |      |                                                                                                                                                                                                       |       |
| Supplementary information    | 21   | Provide information about the availability of supplementary resources, such as study protocol, Web calculator, and data sets.                                                                         | NR    |
| Funding                      | 22   | Give the source of funding and the role of the funders for the present study.                                                                                                                         | 13    |

We recommend using the TRIPOD Checklist in conjunction with the TRIPOD Explanation and Elaboration document.

# BMJ Open

## Development of a prediction model to aid primary care physicians in early identification of women at high risk of developing endometriosis: a cross-sectional study

|                                 |                                                                                                                                                                                                                                                                                                                                                                                                                                                                              |
|---------------------------------|------------------------------------------------------------------------------------------------------------------------------------------------------------------------------------------------------------------------------------------------------------------------------------------------------------------------------------------------------------------------------------------------------------------------------------------------------------------------------|
| Journal:                        | <i>BMJ Open</i>                                                                                                                                                                                                                                                                                                                                                                                                                                                              |
| Manuscript ID                   | bmjopen-2019-030346.R1                                                                                                                                                                                                                                                                                                                                                                                                                                                       |
| Article Type:                   | Research                                                                                                                                                                                                                                                                                                                                                                                                                                                                     |
| Date Submitted by the Author:   | 27-Aug-2019                                                                                                                                                                                                                                                                                                                                                                                                                                                                  |
| Complete List of Authors:       | Verket, Nina; University of Oslo, Institute of Clinical Medicine; Oslo University Hospital, Research Center for Obstetrics and Gynecology Sørumsfalk, Ragnhild; Oslo University Hospital, Oslo Center for Biostatistics and Epidemiology<br>Qvigstad, Erik; Oslo University Hospital, Department of Gynecology<br>Tanbo, Tom ; University of Oslo, Institute of Clinical Medicine<br>Sandvik, Leiv; Oslo University Hospital, Oslo Center for Biostatistics and Epidemiology |
| <b>Primary Subject Heading</b>: | General practice / Family practice                                                                                                                                                                                                                                                                                                                                                                                                                                           |
| Secondary Subject Heading:      | Obstetrics and gynaecology                                                                                                                                                                                                                                                                                                                                                                                                                                                   |
| Keywords:                       | PRIMARY CARE, GYNAECOLOGY, Endometriosis                                                                                                                                                                                                                                                                                                                                                                                                                                     |
|                                 |                                                                                                                                                                                                                                                                                                                                                                                                                                                                              |

SCHOLARONE™  
Manuscripts

# Development of a prediction model to aid primary care physicians in early identification of women at high risk of developing endometriosis: a cross-sectional study

## Cross-sectional anonymous postal questionnaire study

Nina Julie Verket, research fellow\*<sup>1,2</sup>, Ragnhild Sørum Falk, senior statistician<sup>3</sup>, Erik Qvigstad, senior consultant<sup>1,4</sup>, Tom Gunnar Tanbo, senior consultant<sup>1,5</sup>, Leiv Sandvik, senior statistician<sup>3</sup>

<sup>1</sup>Institute of Clinical Medicine, University of Oslo, Norway

<sup>2</sup>Research Center for Obstetrics and Gynecology, Oslo University Hospital, Norway

<sup>3</sup>Oslo Centre for Biostatistics and Epidemiology, Oslo University Hospital, Norway

<sup>4</sup>Department of Gynecology, Oslo University Hospital, Norway

<sup>5</sup>Department of Reproductive Medicine, Oslo University Hospital, Norway

Corresponding author: Nina Julie Verket, [ninaverket@gmail.com](mailto:ninaverket@gmail.com), Research Center for Obstetrics and Gynecology, Women's Division, Oslo University Hospital Ullevål, Pb 4956 Nydalen, 0424 Oslo, Norway.

## Abstract

**Objectives** To identify predictors of disease among a few factors commonly associated with endometriosis, and if successful, to combine these to develop a prediction model to aid primary care physicians in early identification of women at high risk of developing endometriosis.

**Design:** Cross-sectional anonymous postal questionnaire study.

**Setting:** Women aged 18-45 years recruited from the Norwegian Endometriosis Association and a random sample of women residing in Oslo, Norway.

**Participants:** 157 women with and 156 women without endometriosis.

**Main outcome measures:** Logistic and lasso regression analysis were performed with endometriosis as dependent variable. Predictors were identified and combined to develop a prediction model. The predictive ability of the model was evaluated by calculating area under the receiver operating characteristic curve (AUC) and positive and negative predictive values (PPV and NPV). To take into account the likelihood of skewed representativeness of the patient sample towards high symptom burden, we considered the following hypothetical prevalences of endometriosis in the general population: 0.1%, 0.5%, 1%, and 2%.

**Results:** A prediction model based on the two strongest predictors, frequent *absenteeism from school due to painful menstruations* and positive *family history of endometriosis*, demonstrated an AUC of 0.83. For the prevalences 0.1%, 0.5%, 1%, and 2%, this prediction model ascertained endometriosis with PPV equal to 2.0%, 9.4%, 17.2%, and 29.6%, respectively. NPV was at least 98% for all values considered.

**Conclusions:** The prediction model needs to be validated in future studies before use. Meanwhile, endometriosis should be considered a differential diagnosis in women with frequent absenteeism from school or work due to painful menstruations and positive family history of endometriosis.

**Trial registration:** #2011/2213/Regional Committee for Medical and Health Research Ethics, division south-eastern Norway B

## Article summary

### Strengths and limitations of this study

- The present study is the first to identify and combine predictors of endometriosis to develop a prediction model which may be used in primary care.
- A randomly selected sample from the general population was used to recruit control subjects.
- We did not have access to medical records.
- Possible recall and selection bias cannot be excluded.
- External validation is needed before model implementation.

For peer review only

## Introduction

Endometriosis is a chronic inflammatory gynecological disease with an estimated prevalence of ~5% among women of child bearing age.<sup>1 2</sup> Tissue similar to the inner lining of the uterus in aberrant locations can cause pain, most frequently painful menstruations and painful intercourse, and infertility.<sup>3</sup> Disease onset can be as early as adolescence, with disease persistence throughout reproductive age until a presumed burn out at menopause. Both disease expression and disease progression can vary markedly.<sup>2</sup> There is no cure, and symptomatic treatment can vary from occasional use of over-the-counter pain-killers to multiple extensive surgeries with adhesiolysis and organ resection or removal.<sup>4</sup> Thus, the potential consequences of early onset progressive endometriosis can be substantial and last multiple decades.<sup>5 6</sup>

Endometriosis is difficult to diagnose because painful menstruations, painful intercourse, and infertility are common among too many without endometriosis. To date, the only way of diagnosing endometriosis is visual confirmation of abnormal patches of tissue during surgery.<sup>7</sup> Thus, it is not surprising that for some it may take years before endometriosis is diagnosed, prolonging patient uncertainty and delaying treatment and care.<sup>8-10</sup> It follows from the lack of diagnostic tools that the longest delay takes place in primary care.<sup>5 11</sup>

Screening tools are often developed for screening of general populations. However, in the field of endometriosis, screening tool development has been confined to women attending secondary and tertiary gynecological surgical units or infertility clinics.<sup>12 13</sup> Even if successful, screening tools developed from such studies would not be applicable in primary care due to the requirement of specialized examinations such as ultrasound, MRI, or surgery.<sup>14</sup> In the present study we used a control group from the general population. Our objectives were to identify predictors of disease among a few factors commonly associated with endometriosis and available to physicians through medical interview, and if successful, to combine these to develop and internally validate a prediction model to aid primary care physicians in early identification of women at high risk of developing endometriosis.

## Participants and methods

### Study design and data collection

Cross-sectional data collection was performed from 2012 to 2013. A postal questionnaire for anonymous reply was sent to women with endometriosis and a random sample of women from the general population.

### Study populations

Women with endometriosis were recruited from the Norwegian Endometriosis Association. Inclusion criteria were 18-45 years of age and surgically confirmed diagnosis. In total, 162 of 375 women successfully completed and returned the questionnaire. Among these, five reported that their diagnosis had not been confirmed surgically and were excluded. Thus, 157 women with endometriosis were included, representing a response rate of 41.9% (supplementary flow chart).



1  
2  
3 Following approval from the Norwegian Tax Administration, the Norwegian Civil Registry  
4 provided names and addresses of a random sample of women aged 18-45 years living in Oslo,  
5 Norway. Inclusion criteria were 18-45 years of age and no known diagnosis of endometriosis. In  
6 total, 159 of 1050 women successfully completed and returned the questionnaire. Although the  
7 survey included a letter asking only women without endometriosis to participate, three women  
8 reported having endometriosis and were excluded. Thus, 156 women without endometriosis were  
9 included, representing a response rate of 14.9% (supplementary flow chart).  
10  
11

### 12 **Basic characteristics**

13 Background information included age, height, weight, and symptoms (dysmenorrhea, pelvic  
14 pain, dysuria, dyschezia, fatigue, nausea, irregular menstrual bleeding, and irregular bowel  
15 movements) experienced at any time during the four weeks prior to answering the questionnaire.  
16 For participants with endometriosis, diagnostic delay was recorded as year receiving diagnosis  
17 minus year the participant started having symptoms. Disease duration was recorded as year of  
18 data collection minus year receiving diagnosis. Further, the questionnaire included a multiple  
19 choice question on organs/anatomic locations affected by endometriosis, and two open questions  
20 inviting free description of previous and present treatment.  
21  
22  
23

### 24 **Candidate predictors**

25 The candidate predictors were chosen based on three criteria: 1) They had to be applicable to  
26 most, if not all female adolescents. By this criterion, variables such as dyspareunia (according to  
27 surveys from 99700 Norwegian high school students from 2016 to 2018, about half have had  
28 intercourse by the age of 18), ultrasound/MR findings, surgical findings, infertility, and previous  
29 pregnancies were excluded as candidate predictors.<sup>15</sup> 2) They had to be simple and  
30 comprehensible to young adolescents, without the need for supplementary explanation. By this  
31 criterion, variables such as pelvic pain (we were for example not confident in adolescents' ability  
32 to readily localize symptoms as from the pelvis) and the concept of cyclic vs non-cyclic  
33 symptoms, were excluded. 3) They had to be available from early stages of the disease and  
34 reasonably frequent. By this criterion, variables such as dysuria and dyschezia were excluded.  
35 The following candidate predictors (with the answer alternatives given in parenthesis) were  
36 included in the final questionnaire:  
37  
38  
39

- 40 1. Age at menarche
- 41 2. Severe dysmenorrhea in adolescence (never/rarely/sometimes/often/always)
- 42 3. Absenteeism from school – junior high school and/or high school – due to dysmenorrhea  
43 (never/rarely/sometimes/often/always)
- 44 4. Use of painkillers due to dysmenorrhea in adolescence  
45 (never/rarely/sometimes/often/always)
- 46 5. Use of oral contraceptives due to dysmenorrhea in adolescence (yes/no)
- 47 6. Family history of endometriosis (yes/no/I don't know/irrelevant)
- 48  
49

### 50 **Statistical analysis**

51 Data were presented as mean with standard deviation for continuous variables and as frequencies  
52 with percentages for categorical variables. Continuous variables were compared using  
53 independent samples t-test. Categorical variables were compared using Pearson's chi-squared  
54  
55  
56  
57  
58  
59  
60

test. Ordered categorical variables were compared using linear-by-linear association chi-squared test.

*Development of risk indices:* Two different approaches were used to develop two risk indices: Endometriosis Risk Index variant 1 (ERI-1) based on logistic regression analysis, and Endometriosis Risk Index variant 2 (ERI-2) based on lasso regression analysis. Logistic regression analysis is one of the most frequently used methods to develop prediction models by selecting relevant predictors and combining them statistically into a multivariable model.<sup>16</sup> However, logistic regression may overestimate performance. We therefore applied lasso regression analysis, a penalization procedure that performs both variable selection and regularization, during model development, as recommended in the TRIPOD checklist for developing and validating prediction models.<sup>16</sup>

In the regression analyses, *age at menarche* was included as a continuous variable. To increase test power, the ordered categorical variables *severe dysmenorrhea in adolescence* and *absenteeism from school due to dysmenorrhea* were included as continuous variables based on linearity of the beta coefficients, supporting the assumption of the categories (never/rarely/sometimes/often/always) being equally spaced. The ordered categorical variable *use of painkillers due to dysmenorrhea in adolescence* was recoded into three categories (never/rarely, sometimes, and often/always) based on deviations from linearity of the beta coefficients. *Use of oral contraceptives due to dysmenorrhea in adolescence* was included as a dichotomous (yes/no) variable. The categorical variable *family history of endometriosis* was recoded into two categories (yes and no/I don't know/irrelevant/missing) to be able to handle the real-life response categories "I don't know" and "Irrelevant" (for example if adopted). Missing responses were also included in this dichotomous categorization due to the likelihood of blank responses being comparable to "I don't know". Participants with complete data for the candidate predictors according to the description above, were included in the analyses (154 cases and 145 controls). Further, a sensitivity analysis was performed, i.e. a re-analysis with an alternative dichotomous categorization (yes/no) for the candidate predictor *family history of endometriosis*, excluding the responses "I don't know", "Irrelevant", and missing (142 cases and 130 controls).

First, univariable and multivariable logistic regression analysis were performed to assess the relationship between the six candidate predictors and endometriosis. Backward stepwise variable selection was performed using  $p \leq 0.157$  as criterion (corresponding to Akaike information criteria). The results were presented as beta coefficients and odds ratios with 95% confidence intervals based on 1000 bootstrap samples. ERI-1 was based on the relative ratio between the beta coefficients. Second, lasso regression analysis was performed with 10-fold cross-validation and 1000 bootstrap samples, as implemented in the R package *mami*. The results were presented as means of the lasso regression coefficients with 95% confidence intervals. ERI-2 was based on the relative ratios between the lasso regression coefficients.

*Internal validation:* The predictive abilities of the two risk indices, ERI-1 and ERI-2, were described by area under the receiver operating characteristic curve (AUC). Sensitivity and specificity for different cut-off values of the risk indices were calculated, as well as positive and negative predictive values (PPV and NPV). To take into account the likelihood of skewed representativeness of the patient sample towards high symptom burden,<sup>17</sup> we considered the

following hypothetical prevalences of endometriosis in the general population: 0.1%, 0.5%, 1%, and 2%. Participants with complete data for the predictors included in ERI-1 and ERI-2 (155 cases and 148 controls) were included in the analyses.

A significance level of 5% was used if not otherwise stated. All analyses were performed with IBM SPSS Statistics version 22, Stata/SE version 15, and R version 3.5.

### Patient and Public Involvement

A representative of the Norwegian Endometriosis Association assessed readability and respondent burden of the questionnaire prior to survey administration. Patients were not consulted to interpret the results. Patients were not invited to contribute to the writing or editing of this document for readability or accuracy.

## Results

### Basic characteristics of the participants

Basic characteristics of the participants are presented in tables 1, 2, and 3. All 157 participants with endometriosis reported surgically confirmed diagnosis. Of these, 123 reported previous or present affection of one or both ovaries, bladder, vagina, and/or bowels. To an open question inviting free description of previous treatment, 122 reported surgical treatment. Of these, 33 reported specific surgical procedures including 18 hysterectomies, 12 oophorectomies (11 unilateral, one bilateral), five cystectomies of endometriomas, and seven partial colectomies.

Table 1 Recent characteristics of the participants

| Variable                                          | Endometriosis group<br>n = 157 |         | Control group<br>n = 156 |         | p-value              |
|---------------------------------------------------|--------------------------------|---------|--------------------------|---------|----------------------|
| Age (years), mean ± 1 SD                          | 35.2 ± 6.5                     |         | 32.6 ± 6.5               |         | < 0.001 <sup>b</sup> |
| BMI (kg/m <sup>2</sup> ), mean ± 1 SD             | 24.8 ± 5.2                     |         | 23.4 ± 4.1               |         | 0.02 <sup>b</sup>    |
| Dysmenorrhea <sup>a</sup> , n (%)                 | 97                             | (71.9%) | 66                       | (43.4%) | <0.001 <sup>c</sup>  |
| Pelvic pain <sup>a</sup> , n (%)                  | 129                            | (84.9%) | 29                       | (19.2%) | <0.001 <sup>c</sup>  |
| Dysuria <sup>a</sup> , n (%)                      | 52                             | (33.8%) | 6                        | (3.9%)  | <0.001 <sup>c</sup>  |
| Dyschezia <sup>a</sup> , n (%)                    | 83                             | (53.5%) | 17                       | (11.0%) | <0.001 <sup>c</sup>  |
| Fatigue <sup>a</sup> , n (%)                      | 143                            | (91.1%) | 91                       | (59.1%) | <0.001 <sup>c</sup>  |
| Nausea <sup>a</sup> , n (%)                       | 73                             | (46.5%) | 30                       | (19.2%) | <0.001 <sup>c</sup>  |
| Irregular menstrual bleeding <sup>a</sup> , n (%) | 45                             | (32.4%) | 22                       | (14.7%) | <0.001 <sup>c</sup>  |
| Irregular bowel movements <sup>a</sup> , n (%)    | 105                            | (68.2%) | 37                       | (24.2%) | <0.001 <sup>c</sup>  |

<sup>a</sup> Experienced at any time during the 4 weeks prior to answering the questionnaire. <sup>b</sup> Independent samples t-test. <sup>c</sup> Pearson's chi-squared test. Because of missing values, the calculated percentages may not refer to the total number of participants.

Table 2 Adolescent characteristics and family history of the participants

| Variable                                                                 |                       | Endometriosis group<br>n = 157 |         | Control group<br>n = 156 |         | p-value             |
|--------------------------------------------------------------------------|-----------------------|--------------------------------|---------|--------------------------|---------|---------------------|
| <b>Age at menarche (years), mean ± 1 SD</b>                              |                       | 12.7 ± 1.5                     |         | 13.0 ± 1.6               |         | 0.11 <sup>a</sup>   |
|                                                                          | <i>Missing, n (%)</i> | 1                              | (0.6%)  | 7                        | (4.5%)  |                     |
| <b>Severe dysmenorrhea in adolescence, n (%)</b>                         | Never                 | 5                              | (3.2%)  | 30                       | (20.1%) | <0.001 <sup>b</sup> |
|                                                                          | Rarely                | 13                             | (8.3%)  | 36                       | (24.2%) |                     |
|                                                                          | Sometimes             | 31                             | (19.9%) | 43                       | (28.9%) |                     |
|                                                                          | Often                 | 45                             | (28.8%) | 21                       | (14.1%) |                     |
|                                                                          | Always                | 62                             | (39.7%) | 19                       | (12.8%) |                     |
|                                                                          | <i>Missing</i>        | 1                              | (0.6%)  | 7                        | (4.5%)  |                     |
| <b>Absenteeism from school due to dysmenorrhea, n (%)</b>                | Never                 | 28                             | (17.8%) | 99                       | (66.4%) | <0.001 <sup>b</sup> |
|                                                                          | Rarely                | 23                             | (14.6%) | 26                       | (17.4%) |                     |
|                                                                          | Sometimes             | 52                             | (33.1%) | 17                       | (11.4%) |                     |
|                                                                          | Often                 | 38                             | (24.2%) | 5                        | (3.4%)  |                     |
|                                                                          | Always                | 16                             | (10.2%) | 2                        | (1.3%)  |                     |
|                                                                          | <i>Missing</i>        | 0                              | (0%)    | 7                        | (4.5%)  |                     |
| <b>Use of painkillers for dysmenorrhea in adolescence, n (%)</b>         | Never                 | 20                             | (12.8%) | 56                       | (37.6%) | <0.001 <sup>b</sup> |
|                                                                          | Rarely                | 15                             | (9.6%)  | 30                       | (20.1%) |                     |
|                                                                          | Sometimes             | 36                             | (23.1%) | 40                       | (26.8%) |                     |
|                                                                          | Often                 | 39                             | (25.0%) | 10                       | (6.7%)  |                     |
|                                                                          | Always                | 46                             | (29.5%) | 13                       | (8.7%)  |                     |
|                                                                          | <i>Missing</i>        | 1                              | (0.6%)  | 7                        | (4.5%)  |                     |
| <b>Use of oral contraceptives for dysmenorrhea in adolescence, n (%)</b> | Yes                   | 60                             | (38.2%) | 17                       | (11.5%) | <0.001 <sup>c</sup> |
|                                                                          | No                    | 97                             | (61.8%) | 131                      | (88.5%) |                     |
|                                                                          | <i>Missing</i>        | 0                              | (0%)    | 8                        | (5.1%)  |                     |
| <b>Family history of endometriosis, n (%)</b>                            | Yes                   | 42                             | (26.8%) | 7                        | (4.5%)  | <0.001 <sup>c</sup> |
|                                                                          | Not yes <sup>d</sup>  | 115                            | (73.2%) | 149                      | (95.5%) |                     |

<sup>a</sup> Independent samples t-test. <sup>b</sup> Linear-by-linear association chi-squared test. <sup>c</sup> Pearson's chi-squared test. <sup>d</sup> Not yes: no/I don't know/irrelevant/missing

Table 3 Further characteristics of the endometriosis group

|                                                             |               |
|-------------------------------------------------------------|---------------|
| <b>Diagnostic delay (years), mean <math>\pm</math> 1 SD</b> | 8.1 $\pm$ 6.5 |
| <b>Disease duration (years), mean <math>\pm</math> 1 SD</b> | 6.6 $\pm$ 5.0 |
| <b>Diagnosis confirmed by surgery</b>                       | 100%          |
| <b>Organ affected <sup>a</sup> (n = 148)</b>                |               |
| Only peritoneum, n (%)                                      | 10 (6.8%)     |
| Ovaries, n (%)                                              | 98 (66.2%)    |
| Bladder, n (%)                                              | 36 (24.3%)    |
| Vagina, n (%)                                               | 28 (18.9%)    |
| Bowels, n (%)                                               | 54 (36.5%)    |
| <b>Previous treatment <sup>b</sup> (n = 146)</b>            |               |
| Analgesic, n (%)                                            | 17 (11.6%)    |
| Hormonal, n (%)                                             | 85 (58.2%)    |
| Surgical, n (%)                                             | 122 (83.6%)   |
| <b>Present treatment <sup>b</sup> (n = 138)</b>             |               |
| No treatment, n (%)                                         | 45 (32.6%)    |
| Receiving treatment, n (%)                                  | 93 (67.4%)    |
| Analgesic, n (%)                                            | 28 (30.1%)    |
| Hormonal n (%)                                              | 73 (78.5%)    |
| Awaiting surgery, n (%)                                     | 4 (2.9%)      |

<sup>a</sup> Multiple choice question. <sup>b</sup> Open question inviting free description.

### Candidate predictors

Responses to the candidate predictors are presented in table 2. Blank responses were described as missing. In the control group, six participants skipped an entire page of the questionnaire (including the candidate predictors) most likely by error, and therefore had blank responses for all candidate predictors.

Regarding family history of endometriosis in the endometriosis group, 42 participants reported positive family history, 102 negative family history, seven answered “I don’t know”, five “irrelevant”, and one did not answer at all. Of the 42 who reported positive family history, 41 specified nature of kinship (reporting one to three relatives each). 19 reported a mother, 13 a sister, nine one or more aunts, four a grandmother, three a cousin, two parent’s cousin, one a niece, and one a great aunt. In total, 28 of 41 (68.3%) reported one or more first-degree relatives with endometriosis. In the control group, seven participants reported positive family history and 126 negative family history. None of the participants answered “I don’t know”, eight answered “irrelevant”, and 15 did not answer at all. Of the seven who reported positive family history, six reported one or more sisters, one a mother, and one a cousin. All seven reported one or more first-degree relatives with endometriosis.

### Development of Endometriosis Risk Index variant 1 using logistic regression analysis

Based on univariable logistic regression analysis, *use of painkillers due to dysmenorrhea in adolescence, family history of endometriosis, use of oral contraceptives due to dysmenorrhea in adolescence, absenteeism from school due to dysmenorrhea, and severe dysmenorrhea in adolescence* were the strongest predictors of endometriosis (table 4). Multivariable logistic regression analysis with backward stepwise variable selection procedure resulted in two predictors: *absenteeism from school due to dysmenorrhea (A)*, and *family history of endometriosis (F)*. Based on the relative ratio between the beta coefficients (A : F ratio was 1.1 : 2.3, rounded to 1 : 2), the following risk index was developed and assigned scores from 0 to 6:

ERI-1 = A + 2F, where

- A = Absenteeism from school due to dysmenorrhea (never = 0 points, rarely = 1 point, sometimes = 2 points, often = 3 points, always = 4 points)
- F = Family history of endometriosis (yes = 1 point, not yes = 0 points).

### Development of Endometriosis Risk Index variant 2 using lasso regression analysis

Based on lasso regression analysis, four predictors were selected: *severe dysmenorrhea in adolescence, absenteeism from school due to dysmenorrhea, use of painkillers due to dysmenorrhea in adolescence* (the categories often or always), and *family history of endometriosis* (table 4). Based on the relative ratios between the means of the lasso regression coefficients, the following risk index was developed and assigned scores from 0 to 44:

ERI-2 = D + 6A + 2P + 14F, where

- D: Severe Dysmenorrhea in adolescence (never = 0 points, rarely = 1 point, sometimes = 2 points, often = 3 points, always = 4 points).
- A: Absenteeism from school due to dysmenorrhea (never = 0 points, rarely = 1 point, sometimes = 2 points, often = 3 points, always = 4 points).
- P: Use of Painkillers due to dysmenorrhea in adolescence (never/rarely/sometimes = 0 points, often/always = 1 point).
- F: Family history of endometriosis (yes = 1 point, not yes = 0 points).

Table 4 Logistic and lasso regression analyses of candidate predictors of endometriosis

| Candidate predictors                                | Univariable logistic regression |                 | Multivariable logistic regression |                 | Logistic regression with backward stepwise selection <sup>c</sup> |                 | Lasso regression |              |
|-----------------------------------------------------|---------------------------------|-----------------|-----------------------------------|-----------------|-------------------------------------------------------------------|-----------------|------------------|--------------|
|                                                     | B                               | OR (95%CI)      | B                                 | OR (95% CI)     | B                                                                 | OR (95% CI)     | B                | (95% CI)     |
| <i>Intercept</i>                                    |                                 |                 | -2.6                              | 0.1 (0.0, 0.9)  | -1.5                                                              | 0.2 (0.1, 0.3)  | -1.5             | (-4.3, -0.5) |
| Age at menarche (years)                             | -0.1                            | 0.9 (0.8, 1.0)  | 0.1                               | 1.1 (0.9, 1.3)  |                                                                   |                 |                  |              |
| Severe dysmenorrhea <sup>a</sup> (cont.)            | 0.8                             | 2.2 (1.8, 2.8)  | 0.2                               | 1.2 (0.9, 1.8)  |                                                                   |                 | 0.1              | (0.0, 0.5)   |
| Absenteeism from school <sup>b</sup> (cont.)        | 1.1                             | 3.0 (2.2, 3.9)  | 0.9                               | 2.5 (1.6, 3.7)  | 1.1                                                               | 3.0 (2.3, 4.1)  | 0.8              | (0.5, 1.2)   |
| Use of painkillers <sup>b</sup> (ref. never/rarely) |                                 |                 |                                   |                 |                                                                   |                 |                  |              |
| Sometimes                                           | 0.9                             | 2.3 (1.2, 4.5)  | -0.2                              | 0.8 (0.4, 2.0)  |                                                                   |                 |                  |              |
| Often/Always                                        | 2.3                             | 9.8 (5.2, 18.7) | 0.2                               | 1.3 (0.5, 3.5)  |                                                                   |                 | 0.3              | (0.0, 1.0)   |
| Use of oral contraceptives <sup>b</sup>             | 1.6                             | 4.8 (2.6, 8.8)  | 0.1                               | 1.1 (0.5, 2.6)  |                                                                   |                 |                  |              |
| Family history of endometriosis                     | 2.2                             | 8.7 (3.2, 23.5) | 2.2                               | 9.4 (2.9, 30.6) | 2.3                                                               | 9.5 (3.1, 29.2) | 1.7              | (1.0, 3.0)   |

Only participants with complete data for the candidate predictors (154 cases and 145 controls) were included in the analyses. OR: Odds ratio. CI: Confidence interval based on 1000 bootstrap samples. cont.: Continuous. <sup>a</sup> Experienced in adolescence. <sup>b</sup> Due to dysmenorrhea in adolescence. <sup>c</sup> Backward stepwise variable selection was performed using Wald test statistics  $p \leq 0.157$  as the criterion for inclusion.

Logistic and lasso regression analysis including participants with complete data for the candidate predictors, who only responded “Yes” or “No” to the candidate predictor *family history of endometriosis*” (142 cases and 130 controls), did not alter the findings (supplementary table).

### Internal validation

The AUC was 0.83 and 0.85 for ERI-1 and ERI-2, respectively. Sensitivities and specificities for different cut-off values for ERI-1 and ERI-2 are presented in table 5 and 6. Estimated specificities for ERI-1 with cut-off  $\geq 5$  ( $\text{ERI-1} \geq 5$ ) and ERI-2 with cut-off  $\geq 33$  ( $\text{ERI-2} \geq 33$ ) were 100%. As a true specificity of 100% is highly unlikely, we chose a value of 99.5% when calculating PPV for  $\text{ERI-1} \geq 5$  and  $\text{ERI-2} \geq 33$ .

For each hypothetical prevalence, PPV and NPV were calculated for ERI-1 cut-off values 2, 3, 4, and 5 (table 5), and for ERI-2 cut-off values 12, 19, 26, and 33 (table 6). The highest cut-off value provided the highest PPV. For the prevalences 0.1%, 0.5%, 1%, and 2%, both prediction models “ $\text{ERI-1} \geq 5$ ” (score range 0-6) and “ $\text{ERI-2} \geq 33$ ” (score range 0-44) ascertained endometriosis with PPV equal to 2.0%, 9.4%, 17.2%, and 29.6%, respectively. For both indices, PPV was low for the cut-off value that provided the highest sensitivity. NPV was at least 98% for all values considered (table 5 and 6). In the present dataset, 16 of 155 participants with endometriosis achieved  $\text{ERI-1} \geq 5$  and  $\text{ERI-2} \geq 33$ . Among participants without endometriosis, the highest achieved ERI-1 and ERI-2 scores were 4 and 32, respectively.

Table 5 Positive and negative predictive value for Endometriosis Risk Index variant 1 (score range 0-6) with cut-off values 2, 3, 4, and 5, for different possible prevalences of endometriosis

| Possible prevalences | ERI-1 $\geq$ 2                         |        | ERI-1 $\geq$ 3                         |       | ERI-1 $\geq$ 4                         |       | ERI-1 $\geq$ 5                          |       |
|----------------------|----------------------------------------|--------|----------------------------------------|-------|----------------------------------------|-------|-----------------------------------------|-------|
|                      | Sensitivity 76.8%<br>Specificity 79.7% |        | Sensitivity 45.2%<br>Specificity 92.6% |       | Sensitivity 24.5%<br>Specificity 98.0% |       | Sensitivity 10.3%<br>Specificity 100.0% |       |
|                      | PPV                                    | NPV    | PPV                                    | NPV   | PPV                                    | NPV   | PPV                                     | NPV   |
| 2.0%                 | 7.2%                                   | 99.4%  | 11.1%                                  | 98.8% | 20.0%                                  | 98.5% | 29.6% <sup>a</sup>                      | 98.2% |
| 1.0%                 | 3.7%                                   | 99.7%  | 5.8%                                   | 99.4% | 11.0%                                  | 99.2% | 17.2% <sup>a</sup>                      | 99.1% |
| 0.5%                 | 1.9%                                   | 99.9%  | 3.0%                                   | 99.7% | 5.8%                                   | 99.6% | 9.4% <sup>a</sup>                       | 99.5% |
| 0.1%                 | 0.4%                                   | 100.0% | 0.6%                                   | 99.9% | 1.2%                                   | 99.9% | 2.0% <sup>a</sup>                       | 99.9% |

Only participants with complete data for the predictors included in Endometriosis Risk Index variant 1 and 2 (155 cases and 148 controls) were included in the analyses. ERI-1: Endometriosis Risk Index variant 1. PPV: Positive predictive value. NPV: Negative predictive value. <sup>a</sup> PPV for ERI-1 cut-off  $\geq$  5 was calculated using specificity 99.5%, not 100.0%

Table 6 Positive and negative predictive value for Endometriosis Risk Index variant 2 (score range 0-44) with cut-off values 12, 19, 26, and 33, for different possible prevalences of endometriosis

| Possible prevalences | ERI-2 $\geq$ 12                        |        | ERI-2 $\geq$ 19                        |       | ERI-2 $\geq$ 26                        |       | ERI-2 $\geq$ 33                         |       |
|----------------------|----------------------------------------|--------|----------------------------------------|-------|----------------------------------------|-------|-----------------------------------------|-------|
|                      | Sensitivity 78.1%<br>Specificity 79.7% |        | Sensitivity 45.2%<br>Specificity 92.6% |       | Sensitivity 24.5%<br>Specificity 98.0% |       | Sensitivity 10.3%<br>Specificity 100.0% |       |
|                      | PPV                                    | NPV    | PPV                                    | NPV   | PPV                                    | NPV   | PPV                                     | NPV   |
| 2.0%                 | 7.3%                                   | 99.4%  | 11.1%                                  | 98.8% | 20.0%                                  | 98.5% | 29.6% <sup>a</sup>                      | 98.2% |
| 1.0%                 | 3.7%                                   | 99.7%  | 5.8%                                   | 99.4% | 11.0%                                  | 99.2% | 17.2% <sup>a</sup>                      | 99.1% |
| 0.5%                 | 1.9%                                   | 99.9%  | 3.0%                                   | 99.7% | 5.8%                                   | 99.6% | 9.4% <sup>a</sup>                       | 99.5% |
| 0.1%                 | 0.4%                                   | 100.0% | 0.6%                                   | 99.9% | 1.2%                                   | 99.9% | 2.0% <sup>a</sup>                       | 99.9% |

Only participants with complete data for the predictors included in Endometriosis Risk Index variant 1 and 2 (155 cases and 148 controls) were included in the analyses. ERI-2: Endometriosis Risk Index variant 2. PPV: Positive predictive value. NPV: Negative predictive value. <sup>a</sup> PPV for ERI-2 cut-off  $\geq$  33 was calculated using specificity 99.5%, not 100.0%

## Discussion

### Statement of principal findings

In the present study, regression analysis was used to develop two endometriosis risk indices. The predictors *absenteeism from school due to dysmenorrhea* and *family history of endometriosis* demonstrated the strongest association with disease. Endometriosis Risk Index variant 1 (ERI-1) included these two predictors only. Endometriosis Risk Index variant 2 (ERI-2) included two more: *severe dysmenorrhea in adolescence* and *use of painkillers due to dysmenorrhea in adolescence*. However, these two predictors had the lowest weight among the predictors included in ERI-2. For the hypothetical prevalences of endometriosis in the general population 0.1%, 0.5%, 1%, and 2%, both prediction models “ERI-1  $\geq$  5” (score range 0-6) and “ERI-2  $\geq$  33” (score range 0-44) ascertained endometriosis with PPV equal to 2.0%, 9.4%, 17.2%, and 29.6%, respectively, and NPV was at least 98% for all values considered. Thus, no apparent additional



value was observed for ERI-2 relative to ERI-1. Similar predictive properties may advocate proceeding with the simplest model, “ERI-1  $\geq$  5”.

### Strengths and weaknesses of the study

A major strength of the present study is that it is the first to identify predictors of endometriosis which may be used in primary care. When developing prediction models, high positive predictive value (PPV) is preferable to high sensitivity and specificity. Thus, cut-off values for the risk indices providing the highest PPV were chosen. Depending on the prevalence, the prediction models may identify women at high risk of developing endometriosis with PPVs comparable to that of mammography screening, where PPVs close to 15% are common.<sup>18</sup> However, a sensitivity close to 10% is lower than we would prefer. Still, our patient sample has previously been demonstrated to carry a high disease burden, with marked pain and low health-related quality of life, comparable to or worse than women with rheumatoid arthritis, but with the disease hitting them at a much younger age.<sup>17</sup> Thus, we have a patient sample representing a subtype of endometriosis that would undoubtedly benefit from early diagnosis and treatment. Hence, a screening tool with a sensitivity of 10% seems much better than the alternative of no screening tool. Cut-offs giving a sensitivity and specificity of ~80%, provided an unacceptable PPV of ~3%.

Our study has several weaknesses. First, we did not have access to medical records. Thus, severity of endometriosis could not be assessed. A second weakness is that we cannot exclude the possibility of recall bias. Women with endometriosis may be more liable to recall symptoms suggestive of endometriosis experienced in adolescence compared with women without endometriosis. A third weakness is the low response rate from the general population, following an overall international trend of declining response rates to postal surveys.<sup>19</sup> Thus, the control group may not be completely randomly selected even though random procedures were used for selection. However, the prevalences of *absenteeism from school due to dysmenorrhea* and *family history of endometriosis* in the control group in the present study, were comparable to those found in a Finnish survey involving 1103 adolescent girls from the general population, in which 2.7% reported having a first degree relative with endometriosis, and 5% reported regular absenteeism from school or voluntary activities because of painful menstruation.<sup>20</sup>

### Comparison with other studies

Previous studies on screening tool development have not included control groups from the general population and have not been intended for use in primary care settings, making comparisons of findings difficult.<sup>12 13 21-23</sup> In general, reporting of pain, such as frequency of dysmenorrhea, is subject to substantial individual variation and expected to be of limited predictive value. However, interference of pain with daily life, such as absenteeism from school due to dysmenorrhea, is less common and likely less subject to individual variation. The choice of the response options “never”, “rarely”, “sometimes”, “often”, and “always” to the question on frequency of absenteeism from school, although seldom used in other studies, has most likely been suitable. Endometriosis has an estimated total heritability of about 50%.<sup>24 25</sup> It is therefore not surprising that a positive family history of endometriosis is required for both prediction models to identify women at high risk of developing endometriosis.

1  
2  
3 The predictors identified in the current study are in line with a French study, however more so  
4 for advanced endometriosis than for endometriosis in general.<sup>26</sup> In a cross-sectional study  
5 comparing adolescent markers among women with endometriosis, women with deeply  
6 infiltrating endometriosis were found to have a more positive family history of endometriosis  
7 (OR 3.2) and higher absenteeism from school during menstruation (OR 1.7), than women with  
8 superficial peritoneal endometriosis and/or ovarian endometriomas.<sup>26</sup> In a genome-wide  
9 association study regarding heredity of endometriosis, moderate and severe endometriosis  
10 showed greater genetic burden than minimal or mild endometriosis.<sup>27</sup> Thus, our models may be  
11 more predictive of advanced endometriosis than of endometriosis in general. The prevalence of  
12 deep endometriosis is assumed to be ~2%,<sup>28</sup> which may be a bit overstated according to some  
13 prevalence studies.<sup>29-32</sup> Thus, the chosen range of hypothetical prevalences in the present study  
14 seems appropriate.  
15  
16  
17

### 18 **Future research**

19 More studies on screening tool development for endometriosis including control groups from the  
20 general population are needed. Register studies should be encouraged. However, newer  
21 candidate predictors such as absenteeism from school due to dysmenorrhea with suitable  
22 response options may not always be available. In view of the diversity of endometriosis, different  
23 subtypes may require different prediction models.  
24  
25

### 26 **Conclusions and clinical implications**

27 The developed prediction models need to be validated in future studies before use. Meanwhile,  
28 endometriosis should be considered a differential diagnosis in women with frequent absenteeism  
29 from school or work due to dysmenorrhea and positive family history of endometriosis.  
30 Persevering or increasing interference of pain with daily life should prompt referral to secondary  
31 or tertiary care clinics experienced in handling endometriosis patients.  
32  
33  
34

### 35 **Acknowledgements**

36 We gratefully acknowledge the contribution of Karen Bertelsen of the Norwegian Endometriosis  
37 Association and the association itself.  
38  
39  
40  
41

### 42 **Contributors**

43 Study concept and design: NJV, RSF, LS. Acquisition of data: NJV. Analysis and interpretation  
44 of data: NJV, RSF, EQ, TGT, LS. Drafting of manuscript: NJV, RSF, LS. The final manuscript  
45 was critically revised and approved by all authors.  
46  
47  
48  
49

### 50 **Funding**

51 The present study was funded by the University of Oslo.  
52  
53  
54  
55  
56  
57  
58  
59  
60

## Competing interests

None declared.

## Ethics approval

The study was approved by the Regional Committee for Medical and Health Research Ethics, division south-eastern Norway (trial registration number: 2011/2213/Regional Committee for Medical and Health Research Ethics, division south-eastern Norway B).

## Data Sharing Statement

The data used in the present study is part of a larger dataset. Due to ongoing data analysis, the data used in the present study will not be available until all data analysis is completed. The corresponding author can be contacted for details.

## Dissemination declaration

We aim to disseminate the results in the Norwegian Endometriosis Association newsletter. If the prediction models are validated, primary care physicians will be informed through national health care and primary care physician websites. School nurses will be informed through school nurse networks, including presentation at the annual national school nurse conference.

## References

1. Fuldeore MJ, Soliman AM. Prevalence and Symptomatic Burden of Diagnosed Endometriosis in the United States: National Estimates from a Cross-Sectional Survey of 59,411 Women. *Gynecol Obstet Invest* 2017;82(5):453-61. doi: 10.1159/000452660 [published Online First: 2016/11/08]
2. Zondervan KT, Becker CM, Koga K, et al. Endometriosis. *Nat Rev Dis Primers* 2018;4(1):9. doi: 10.1038/s41572-018-0008-5 [published Online First: 2018/07/22]
3. Vercellini P, Vigano P, Somigliana E, et al. Endometriosis: pathogenesis and treatment. *Nat Rev Endocrinol* 2014;10(5):261-75. doi: 10.1038/nrendo.2013.255
4. Giudice LC. Clinical practice. Endometriosis. *N Engl J Med* 2010;362(25):2389-98. doi: 10.1056/NEJMcp1000274
5. Nnoaham KE, Hummelshoj L, Webster P, et al. Impact of endometriosis on quality of life and work productivity: a multicenter study across ten countries. *Fertil Steril* 2011;96(2):366-73. doi: 10.1016/j.fertnstert.2011.05.090
6. De Graaff AA, D'Hooghe TM, Dunselman GA, et al. The significant effect of endometriosis on physical, mental and social wellbeing: results from an international cross-sectional survey. *Hum Reprod* 2013;28(10):2677-85. doi: 10.1093/humrep/det284

- 1  
2  
3 7. Nisenblat V, Prentice L, Bossuyt PM, et al. Combination of the non-invasive tests for the  
4 diagnosis of endometriosis. *Cochrane Database Syst Rev* 2016;7:CD012281. doi:  
5 10.1002/14651858.CD012281
- 6  
7 8. Husby GK, Haugen RS, Moen MH. Diagnostic delay in women with pain and endometriosis.  
8 *Acta Obstet Gynecol Scand* 2003;82(7):649-53.
- 9  
10 9. Matsuzaki S, Canis M, Pouly JL, et al. Relationship between delay of surgical diagnosis and  
11 severity of disease in patients with symptomatic deep infiltrating endometriosis. *Fertil*  
12 *Steril* 2006;86(5):1314-6; discussion 17. doi: 10.1016/j.fertnstert.2006.03.048
- 13  
14 10. Hudelist G, Fritzer N, Thomas A, et al. Diagnostic delay for endometriosis in Austria and  
15 Germany: causes and possible consequences. *Hum Reprod* 2012;27(12):3412-6. doi:  
16 10.1093/humrep/des316
- 17  
18 11. Staal AH, van der Zanden M, Nap AW. Diagnostic Delay of Endometriosis in the  
19 Netherlands. *Gynecol Obstet Invest* 2016;81(4):321-4. doi: 10.1159/000441911
- 20  
21 12. Calhaz-Jorge C, Mol BW, Nunes J, et al. Clinical predictive factors for endometriosis in a  
22 Portuguese infertile population. *Hum Reprod* 2004;19(9):2126-31. doi:  
23 10.1093/humrep/deh374
- 24  
25 13. Nnoaham KE, Hummelshoj L, Kennedy SH, et al. Developing symptom-based predictive  
26 models of endometriosis as a clinical screening tool: results from a multicenter study.  
27 *Fertil Steril* 2012;98(3):692-701 e5. doi: 10.1016/j.fertnstert.2012.04.022
- 28  
29 14. Surrey E, Carter CM, Soliman AM, et al. Patient-completed or symptom-based screening  
30 tools for endometriosis: a scoping review. *Arch Gynecol Obstet* 2017;296(2):153-65. doi:  
31 10.1007/s00404-017-4406-9
- 32  
33 15. Bakken A. Ungdata. Nasjonale resultater 2018, NOVA Rapport 8/18. Oslo: Norwegian  
34 Social Research (NOVA), 2018.
- 35  
36 16. Collins GS, Reitsma JB, Altman DG, et al. Transparent reporting of a multivariable  
37 prediction model for individual prognosis or diagnosis (TRIPOD): the TRIPOD  
38 statement. *BMJ* 2015;350:g7594. doi: 10.1136/bmj.g7594 [published Online First:  
39 2015/01/09]
- 40  
41 17. Verket NJ, Uhlig T, Sandvik L, et al. Health-related quality of life in women with  
42 endometriosis, compared with the general population and women with rheumatoid  
43 arthritis. *Acta Obstet Gynecol Scand* 2018;97(11):1339-48. doi: 10.1111/aogs.13427  
44 [published Online First: 2018/07/15]
- 45  
46 18. Domingo L, Hofvind S, Hubbard RA, et al. Cross-national comparison of screening  
47 mammography accuracy measures in U.S., Norway, and Spain. *Eur Radiol*  
48 2016;26(8):2520-8. doi: 10.1007/s00330-015-4074-8
- 49  
50 19. Morton LM, Cahill J, Hartge P. Reporting participation in epidemiologic studies: a survey of  
51 practice. *Am J Epidemiol* 2006;163(3):197-203. doi: 10.1093/aje/kwj036 [published  
52 Online First: 2005/12/13]
- 53  
54 20. Suvitie PA, Hallamaa MK, Matomaki JM, et al. Prevalence of Pain Symptoms Suggestive of  
55 Endometriosis Among Finnish Adolescent Girls (TEENMAPS Study). *J Pediatr Adolesc*  
56 *Gynecol* 2016;29(2):97-103. doi: 10.1016/j.jpag.2015.07.001
- 57  
58 21. Chapron C, Barakat H, Fritel X, et al. Presurgical diagnosis of posterior deep infiltrating  
59 endometriosis based on a standardized questionnaire. *Hum Reprod* 2005;20(2):507-13.  
60 doi: 10.1093/humrep/deh627

22. Ballard K, Lane H, Hudelist G, et al. Can specific pain symptoms help in the diagnosis of endometriosis? A cohort study of women with chronic pelvic pain. *Fertil Steril* 2010;94(1):20-7. doi: 10.1016/j.fertnstert.2009.01.164
23. Lafay Pillet MC, Huchon C, Santulli P, et al. A clinical score can predict associated deep infiltrating endometriosis before surgery for an endometrioma. *Hum Reprod* 2014;29(8):1666-76. doi: 10.1093/humrep/deu128
24. Treloar SA, O'Connor DT, O'Connor VM, et al. Genetic influences on endometriosis in an Australian twin sample. *sueT@qimr.edu.au. Fertil Steril* 1999;71(4):701-10.
25. Saha R, Pettersson HJ, Svedberg P, et al. Heritability of endometriosis. *Fertil Steril* 2015;104(4):947-52. doi: 10.1016/j.fertnstert.2015.06.035 [published Online First: 2015/07/26]
26. Chapron C, Lafay-Pillet MC, Monceau E, et al. Questioning patients about their adolescent history can identify markers associated with deep infiltrating endometriosis. *Fertil Steril* 2011;95(3):877-81. doi: 10.1016/j.fertnstert.2010.10.027
27. Sapkota Y, Attia J, Gordon SD, et al. Genetic burden associated with varying degrees of disease severity in endometriosis. *Mol Hum Reprod* 2015;21(7):594-602. doi: 10.1093/molehr/gav021
28. Koninckx PR, Ussia A, Adamyan L, et al. Deep endometriosis: definition, diagnosis, and treatment. *Fertil Steril* 2012;98(3):564-71. doi: 10.1016/j.fertnstert.2012.07.1061
29. Moen MH, Schei B. Epidemiology of endometriosis in a Norwegian county. *Acta Obstet Gynecol Scand* 1997;76(6):559-62.
30. Abbas S, Ihle P, Koster I, et al. Prevalence and incidence of diagnosed endometriosis and risk of endometriosis in patients with endometriosis-related symptoms: findings from a statutory health insurance-based cohort in Germany. *Eur J Obstet Gynecol Reprod Biol* 2012;160(1):79-83. doi: 10.1016/j.ejogrb.2011.09.041
31. von Theobald P, Cottenet J, Iacobelli S, et al. Epidemiology of Endometriosis in France: A Large, Nation-Wide Study Based on Hospital Discharge Data. *Biomed Res Int* 2016;2016:3260952. doi: 10.1155/2016/3260952
32. Eisenberg VH, Weil C, Chodick G, et al. Epidemiology of endometriosis: a large population-based database study from a healthcare provider with 2 million members. *BJOG* 2018;125(1):55-62. doi: 10.1111/1471-0528.14711 [published Online First: 2017/04/27]

## Supplementary flow chart

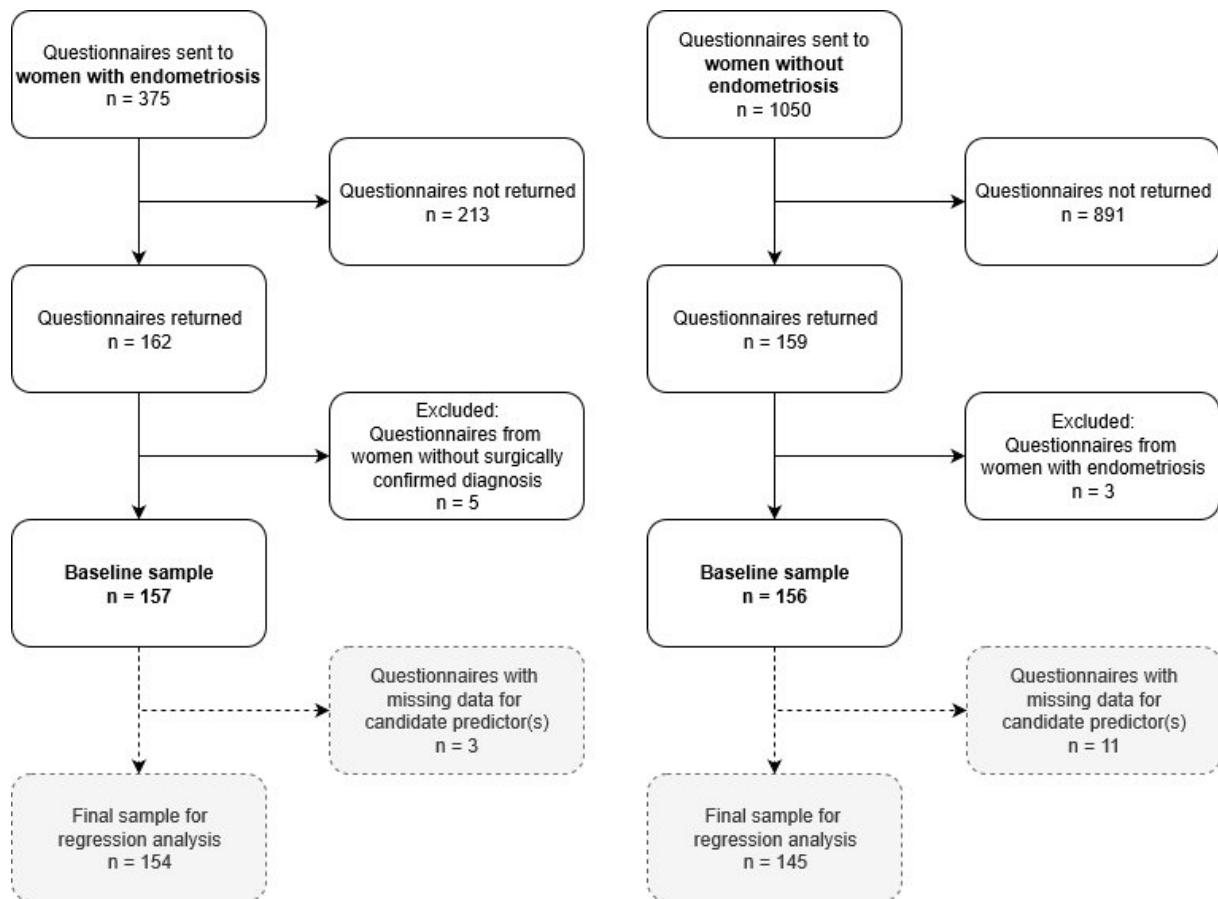

## Supplementary table

### Development of a prediction model to aid primary care physicians in early identification of women at high risk of developing endometriosis: a cross-sectional study

Verket et al.

**Supplementary table:** Logistic and lasso regression analyses of candidate predictors of endometriosis among observation with complete data for the candidate predictors, who only responded “Yes” or “No” to the candidate predictor family history of endometriosis” (142 cases and 130 controls)

| Candidate predictors                                | Univariable logistic regression |                  | Multivariable logistic regression |                 | Logistic regression with backward stepwise selection <sup>c</sup> |                 | Lasso regression |              |
|-----------------------------------------------------|---------------------------------|------------------|-----------------------------------|-----------------|-------------------------------------------------------------------|-----------------|------------------|--------------|
|                                                     | B                               | OR (95%CI)       | B                                 | OR (95% CI)     | B                                                                 | OR (95% CI)     | B                | (95% CI)     |
| <i>Intercept</i>                                    |                                 |                  | -2.5                              | 0.1 (0.0, 1.4)  | -1.5                                                              | 0.2 (0.1, 0.3)  | -1.5             | (-4.1, -0.5) |
| Age at menarche (years)                             | -0.2                            | 0.9 (0.8, 1.0)   | 0.1                               | 1.1 (0.9, 1.3)  |                                                                   |                 |                  |              |
| Severe dysmenorrhea <sup>a</sup> (cont.)            | 0.8                             | 2.2 (1.8, 2.8)   | 0.2                               | 1.2 (0.8, 1.8)  |                                                                   |                 | 0.1              | (0.0, 0.5)   |
| Absenteeism from school <sup>b</sup> (cont.)        | 1.1                             | 2.9 (2.2, 3.8)   | 0.9                               | 2.4 (1.6, 3.6)  | 1.1                                                               | 3.0 (2.2, 4.0)  | 0.8              | (0.5, 1.2)   |
| Use of painkillers <sup>b</sup> (ref. never/rarely) |                                 |                  |                                   |                 |                                                                   |                 |                  |              |
| Sometimes                                           | 0.8                             | 2.3 (1.2, 4.2)   | -0.1                              | 0.9 (0.4, 2.0)  |                                                                   |                 |                  |              |
| Often/Always                                        | 2.3                             | 10.5 (5.4, 20.3) | 0.4                               | 1.5 (0.5, 4.2)  |                                                                   |                 | 0.4              | (0.0, 1.1)   |
| Use of oral contraceptives <sup>b</sup>             | 1.5                             | 4.5 (2.4, 8.4)   | -0.1                              | 0.9 (0.4, 2.2)  |                                                                   |                 |                  |              |
| Family history of endometriosis                     | 2.2                             | 8.7 (3.5, 21.2)  | 2.3                               | 9.5 (3.5, 26.1) | 2.3                                                               | 9.6 (3.6, 26.0) | 1.8              | (1.0, 3.1)   |

OR: Odds ratio. CI: Confidence interval based on 1000 bootstrap samples. cont.: Continuous. <sup>a</sup> Experienced in adolescence. <sup>b</sup> Due to dysmenorrhea in adolescence. <sup>c</sup> Backward stepwise variable selection was performed using Wald test statistics  $p \leq 0.157$  as the criterion for inclusion.

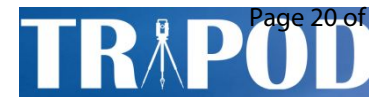

## TRIPOD Checklist: Prediction Model Development

| Section/Topic                | Item | Checklist Item                                                                                                                                                                                        | Page  |
|------------------------------|------|-------------------------------------------------------------------------------------------------------------------------------------------------------------------------------------------------------|-------|
| <b>Title and abstract</b>    |      |                                                                                                                                                                                                       |       |
| Title                        | 1    | Identify the study as developing and/or validating a multivariable prediction model, the target population, and the outcome to be predicted.                                                          | 1     |
| Abstract                     | 2    | Provide a summary of objectives, study design, setting, participants, sample size, predictors, outcome, statistical analysis, results, and conclusions.                                               | 2     |
| <b>Introduction</b>          |      |                                                                                                                                                                                                       |       |
| Background and objectives    | 3a   | Explain the medical context (including whether diagnostic or prognostic) and rationale for developing or validating the multivariable prediction model, including references to existing models.      | 4     |
|                              | 3b   | Specify the objectives, including whether the study describes the development or validation of the model or both.                                                                                     | 4     |
| <b>Methods</b>               |      |                                                                                                                                                                                                       |       |
| Source of data               | 4a   | Describe the study design or source of data (e.g., randomized trial, cohort, or registry data), separately for the development and validation data sets, if applicable.                               | 4     |
|                              | 4b   | Specify the key study dates, including start of accrual; end of accrual; and, if applicable, end of follow-up.                                                                                        | 4     |
| Participants                 | 5a   | Specify key elements of the study setting (e.g., primary care, secondary care, general population) including number and location of centres.                                                          | 4-5   |
|                              | 5b   | Describe eligibility criteria for participants.                                                                                                                                                       | 4-5   |
|                              | 5c   | Give details of treatments received, if relevant.                                                                                                                                                     |       |
| Outcome                      | 6a   | Clearly define the outcome that is predicted by the prediction model, including how and when assessed.                                                                                                | 4-6   |
|                              | 6b   | Report any actions to blind assessment of the outcome to be predicted.                                                                                                                                | NR    |
| Predictors                   | 7a   | Clearly define all predictors used in developing or validating the multivariable prediction model, including how and when they were measured.                                                         | 5     |
|                              | 7b   | Report any actions to blind assessment of predictors for the outcome and other predictors.                                                                                                            | NR    |
| Sample size                  | 8    | Explain how the study size was arrived at.                                                                                                                                                            | NA    |
| Missing data                 | 9    | Describe how missing data were handled (e.g., complete-case analysis, single imputation, multiple imputation) with details of any imputation method.                                                  | 6     |
| Statistical analysis methods | 10a  | Describe how predictors were handled in the analyses.                                                                                                                                                 | 5-6   |
|                              | 10b  | Specify type of model, all model-building procedures (including any predictor selection), and method for internal validation.                                                                         | 5-6   |
|                              | 10d  | Specify all measures used to assess model performance and, if relevant, to compare multiple models.                                                                                                   | 5-6   |
| Risk groups                  | 11   | Provide details on how risk groups were created, if done.                                                                                                                                             | NR    |
| <b>Results</b>               |      |                                                                                                                                                                                                       |       |
| Participants                 | 13a  | Describe the flow of participants through the study, including the number of participants with and without the outcome and, if applicable, a summary of the follow-up time. A diagram may be helpful. | 6-8   |
|                              | 13b  | Describe the characteristics of the participants (basic demographics, clinical features, available predictors), including the number of participants with missing data for predictors and outcome.    | 6-8   |
| Model development            | 14a  | Specify the number of participants and outcome events in each analysis.                                                                                                                               | 8-9   |
|                              | 14b  | If done, report the unadjusted association between each candidate predictor and outcome.                                                                                                              | 9     |
| Model specification          | 15a  | Present the full prediction model to allow predictions for individuals (i.e., all regression coefficients, and model intercept or baseline survival at a given time point).                           | 8-9   |
|                              | 15b  | Explain how to use the prediction model.                                                                                                                                                              | 8-9   |
| Model performance            | 16   | Report performance measures (with CIs) for the prediction model.                                                                                                                                      | 10-11 |
| <b>Discussion</b>            |      |                                                                                                                                                                                                       |       |
| Limitations                  | 18   | Discuss any limitations of the study (such as nonrepresentative sample, few events per predictor, missing data).                                                                                      | 11-12 |
| Interpretation               | 19b  | Give an overall interpretation of the results, considering objectives, limitations, and results from similar studies, and other relevant evidence.                                                    | 11-13 |
| Implications                 | 20   | Discuss the potential clinical use of the model and implications for future research.                                                                                                                 | 12-13 |
| <b>Other information</b>     |      |                                                                                                                                                                                                       |       |
| Supplementary information    | 21   | Provide information about the availability of supplementary resources, such as study protocol, Web calculator, and data sets.                                                                         | NR    |
| Funding                      | 22   | Give the source of funding and the role of the funders for the present study.                                                                                                                         | 13    |

We recommend using the TRIPOD Checklist in conjunction with the TRIPOD Explanation and Elaboration document.



# BMJ Open

## Development of a prediction model to aid primary care physicians in early identification of women at high risk of developing endometriosis: a cross-sectional study

|                                 |                                                                                                                                                                                                                                                                                                                                                                                                                                                                                 |
|---------------------------------|---------------------------------------------------------------------------------------------------------------------------------------------------------------------------------------------------------------------------------------------------------------------------------------------------------------------------------------------------------------------------------------------------------------------------------------------------------------------------------|
| Journal:                        | <i>BMJ Open</i>                                                                                                                                                                                                                                                                                                                                                                                                                                                                 |
| Manuscript ID                   | bmjopen-2019-030346.R2                                                                                                                                                                                                                                                                                                                                                                                                                                                          |
| Article Type:                   | Research                                                                                                                                                                                                                                                                                                                                                                                                                                                                        |
| Date Submitted by the Author:   | 18-Oct-2019                                                                                                                                                                                                                                                                                                                                                                                                                                                                     |
| Complete List of Authors:       | Verket, Nina; University of Oslo, Institute of Clinical Medicine; Oslo University Hospital, Research Center for Obstetrics and Gynecology<br>Sørum Falk, Ragnhild; Oslo University Hospital, Oslo Center for Biostatistics and Epidemiology<br>Qvigstad, Erik; Oslo University Hospital, Department of Gynecology<br>Tanbo, Tom ; University of Oslo, Institute of Clinical Medicine<br>Sandvik, Leiv; Oslo University Hospital, Oslo Center for Biostatistics and Epidemiology |
| <b>Primary Subject Heading</b>: | General practice / Family practice                                                                                                                                                                                                                                                                                                                                                                                                                                              |
| Secondary Subject Heading:      | Obstetrics and gynaecology                                                                                                                                                                                                                                                                                                                                                                                                                                                      |
| Keywords:                       | PRIMARY CARE, GYNAECOLOGY, Endometriosis                                                                                                                                                                                                                                                                                                                                                                                                                                        |
|                                 |                                                                                                                                                                                                                                                                                                                                                                                                                                                                                 |

SCHOLARONE™  
Manuscripts

# Development of a prediction model to aid primary care physicians in early identification of women at high risk of developing endometriosis: a cross-sectional study

## Cross-sectional anonymous postal questionnaire study

Nina Julie Verket, research fellow\*<sup>1,2</sup>, Ragnhild Sørum Falk, senior statistician<sup>3</sup>, Erik Qvigstad, senior consultant<sup>1,4</sup>, Tom Gunnar Tanbo, senior consultant<sup>1,5</sup>, Leiv Sandvik, senior statistician<sup>3</sup>

<sup>1</sup>Institute of Clinical Medicine, University of Oslo, Norway

<sup>2</sup>Research Center for Obstetrics and Gynecology, Oslo University Hospital, Norway

<sup>3</sup>Oslo Centre for Biostatistics and Epidemiology, Oslo University Hospital, Norway

<sup>4</sup>Department of Gynecology, Oslo University Hospital, Norway

<sup>5</sup>Department of Reproductive Medicine, Oslo University Hospital, Norway

Corresponding author: Nina Julie Verket, [ninaverket@gmail.com](mailto:ninaverket@gmail.com), Research Center for Obstetrics and Gynecology, Women's Division, Oslo University Hospital Ullevål, Pb 4956 Nydalen, 0424 Oslo, Norway.

## Abstract

**Objectives:** To identify predictors of disease among a few factors commonly associated with endometriosis, and if successful, to combine these to develop a prediction model to aid primary care physicians in early identification of women at high risk of developing endometriosis.

**Design:** Cross-sectional anonymous postal questionnaire study.

**Setting:** Women aged 18-45 years recruited from the Norwegian Endometriosis Association and a random sample of women residing in Oslo, Norway.

**Participants:** 157 women with and 156 women without endometriosis.

**Main outcome measures:** Logistic and lasso regression analysis were performed with endometriosis as dependent variable. Predictors were identified and combined to develop a prediction model. The predictive ability of the model was evaluated by calculating area under the receiver operating characteristic curve (AUC) and positive and negative predictive values (PPV and NPV). To take into account the likelihood of skewed representativeness of the patient sample towards high symptom burden, we considered the hypothetical prevalences of endometriosis in the general population 0.1%, 0.5%, 1%, and 2%.

**Results:** The predictors *absenteeism from school due to dysmenorrhea* and *family history of endometriosis* demonstrated the strongest association with disease. The model based on logistic regression (AUC 0.83) included these two predictors only, while the model based on lasso regression (AUC 0.85) included two more: *severe dysmenorrhea in adolescence* and *use of painkillers due to dysmenorrhea in adolescence*. For the prevalences 0.1%, 0.5%, 1%, and 2%, both models ascertained endometriosis with PPV equal to 2.0%, 9.4%, 17.2%, and 29.6%, respectively. NPV was at least 98% for all values considered.

**Conclusions:** External validation is needed before model implementation. Meanwhile, endometriosis should be considered a differential diagnosis in women with frequent absenteeism from school or work due to painful menstruations and positive family history of endometriosis.

**Trial registration:** #2011/2213/Regional Committee for Medical and Health Research Ethics, division south-eastern Norway B

## Article summary

### Strengths and limitations of this study

- The present study is the first to identify and combine predictors of endometriosis to develop a prediction model which may be used in primary care.
- A randomly selected sample from the general population was used to recruit control subjects.
- We did not have access to medical records.
- Possible recall and selection bias cannot be excluded.
- External validation is needed before model implementation.

For peer review only

## Introduction

Endometriosis is a chronic inflammatory gynecological disease with an estimated prevalence of ~5% among women of child bearing age.<sup>1 2</sup> Tissue similar to the inner lining of the uterus in aberrant locations can cause pain, most frequently painful menstruations and painful intercourse, and infertility.<sup>3</sup> Disease onset can be as early as adolescence, with disease persistence throughout reproductive age until a presumed burn out at menopause. Both disease expression and disease progression can vary markedly.<sup>2</sup> There is no cure, and symptomatic treatment can vary from occasional use of over-the-counter pain-killers to multiple extensive surgeries with adhesiolysis and organ resection or removal.<sup>4</sup> Thus, the potential consequences of early onset progressive endometriosis can be substantial and last multiple decades.<sup>5 6</sup>

Endometriosis is difficult to diagnose because painful menstruations, painful intercourse, and infertility are common among too many without endometriosis. To date, the only way of diagnosing endometriosis is visual confirmation of abnormal patches of tissue during surgery.<sup>7</sup> Thus, it is not surprising that for some it may take years before endometriosis is diagnosed, prolonging patient uncertainty and delaying treatment and care.<sup>8-10</sup> It follows from the lack of diagnostic tools that the longest delay takes place in primary care.<sup>5 11</sup>

Screening tools are often developed for screening of general populations. However, in the field of endometriosis, screening tool development has been confined to women attending secondary and tertiary gynecological surgical units or infertility clinics.<sup>12 13</sup> Even if successful, screening tools developed from such studies would not be applicable in primary care due to the requirement of specialized examinations such as ultrasound, MRI, or surgery.<sup>14</sup> In the present study we used a control group from the general population. Our objectives were to identify predictors of disease among a few factors commonly associated with endometriosis and available to physicians through medical interview, and if successful, to combine these to develop and internally validate a prediction model to aid primary care physicians in early identification of women at high risk of developing endometriosis.

## Participants and methods

### Study design and data collection

Cross-sectional data collection was performed from 2012 to 2013. A postal questionnaire for anonymous reply was sent to women with endometriosis and a random sample of women from the general population.

### Study populations

Women with endometriosis were recruited from the Norwegian Endometriosis Association. Inclusion criteria were 18-45 years of age and surgically confirmed diagnosis. In total, 162 of 375 women successfully completed and returned the questionnaire. Among these, five reported that their diagnosis had not been confirmed surgically and were excluded. Thus, 157 women with endometriosis were included, representing a response rate of 41.9% (supplementary flow chart).

Following approval from the Norwegian Tax Administration, the Norwegian Civil Registry provided names and addresses of a random sample of women aged 18-45 years living in Oslo, Norway. Inclusion criteria were 18-45 years of age and no known diagnosis of endometriosis. In total, 159 of 1050 women successfully completed and returned the questionnaire. Although the survey included a letter asking only women without endometriosis to participate, three women reported having endometriosis and were excluded. Thus, 156 women without endometriosis were included, representing a response rate of 14.9% (supplementary flow chart).

### Basic characteristics

Background information included age, height, weight, and symptoms (dysmenorrhea, pelvic pain, dysuria, dyschezia, fatigue, nausea, irregular menstrual bleeding, and irregular bowel movements) experienced at any time during the four weeks prior to answering the questionnaire. For participants with endometriosis, diagnostic delay was recorded as year receiving diagnosis minus year the participant started having symptoms. Disease duration was recorded as year of data collection minus year receiving diagnosis. Further, the questionnaire included a multiple choice question on organs/anatomic locations affected by endometriosis, and two open questions inviting free description of previous and present treatment.

### Candidate predictors

The candidate predictors were chosen based on three criteria: 1) They had to be applicable to most, if not all female adolescents. By this criterion, variables such as dyspareunia (according to surveys from 99700 Norwegian high school students from 2016 to 2018, about half have had intercourse by the age of 18), ultrasound/MR findings, surgical findings, infertility, and previous pregnancies were excluded as candidate predictors.<sup>15</sup> 2) They had to be simple and comprehensible to young adolescents, without the need for supplementary explanation. By this criterion, variables such as pelvic pain (we were for example not confident in adolescents' ability to readily localize symptoms as from the pelvis) and the concept of cyclic vs non-cyclic symptoms, were excluded. 3) They had to be available from early stages of the disease and reasonably frequent. By this criterion, variables such as dysuria and dyschezia were excluded. The following candidate predictors (with the questions, Q, and answer alternatives, A, given in parenthesis) were included in the final questionnaire:

1. Age at menarche  
(Q: How old were you when you had your first period?)
2. Severe dysmenorrhea in adolescence  
(Q: Did you have very painful periods as a teenager?)  
(A: Never/Rarely/Sometimes/Often/Always)
3. Absenteeism from school due to dysmenorrhea  
(Q: Did you have to be absent from school – junior high school/high school – because of painful periods?)  
(A: Never/Rarely/Sometimes/Often/Always)
4. Use of painkillers due to dysmenorrhea in adolescence  
(Q: Did you use painkillers for painful periods as a teenager?)  
(A: Never/Rarely/Sometimes/Often/Always)
5. Use of oral contraceptives due to dysmenorrhea in adolescence  
(Q: Did you use oral contraceptives because of painful periods as a teenager?)

(A: Yes/No)

6. Family history of endometriosis

(Q: Does anyone in your family have endometriosis?)

(A: Yes/No/Irrelevant)

### Statistical analysis

Data were presented as mean with standard deviation for continuous variables and as frequencies with percentages for categorical variables. Continuous variables were compared using independent samples t-test. Categorical variables were compared using Pearson's chi-squared test. Ordered categorical variables were compared using linear-by-linear association chi-squared test.

*Development of risk indices:* Two different approaches were used to develop two risk indices: Endometriosis Risk Index variant 1 (ERI-1) based on logistic regression analysis, and Endometriosis Risk Index variant 2 (ERI-2) based on lasso regression analysis. Logistic regression analysis is one of the most frequently used methods to develop prediction models by selecting relevant predictors and combining them statistically into a multivariable model.<sup>16</sup> However, logistic regression may overestimate performance. We therefore applied lasso regression analysis, a penalization procedure that performs both variable selection and regularization, during model development, as recommended in the TRIPOD checklist for developing and validating prediction models.<sup>16</sup>

In the regression analyses, *age at menarche* was included as a continuous variable. To increase test power, the ordered categorical variables *severe dysmenorrhea in adolescence* and *absenteeism from school due to dysmenorrhea* were included as continuous variables based on linearity of the beta coefficients, supporting the assumption of the categories (never/rarely/sometimes/often/always) being equally spaced. The ordered categorical variable *use of painkillers due to dysmenorrhea in adolescence* was recoded into three categories (never/rarely, sometimes, and often/always) based on deviations from linearity of the beta coefficients. *Use of oral contraceptives due to dysmenorrhea in adolescence* was included as a dichotomous (yes/no) variable. The categorical variable *family history of endometriosis* was recoded into two categories (yes and no/irrelevant/missing) to be able to handle the real-life response category "Irrelevant" (for example if adopted). Missing responses were also included in this dichotomous categorization due to the likelihood of blank responses being comparable to participants simply not knowing. Participants with complete data for the candidate predictors according to the description above, were included in the analyses (154 cases and 145 controls). Further, a sensitivity analysis was performed, i.e. a re-analysis with an alternative dichotomous categorization (yes/no) for the candidate predictor *family history of endometriosis*, excluding the responses "Irrelevant" and missing (142 cases and 130 controls).

First, univariable and multivariable logistic regression analysis were performed to assess the relationship between the six candidate predictors and endometriosis. Backward stepwise variable selection was performed using  $p \leq 0.157$  as criterion (corresponding to Akaike information criteria). The results were presented as beta coefficients and odds ratios with 95% confidence intervals based on 1000 bootstrap samples. ERI-1 was based on the relative ratio between the beta coefficients. Second, lasso regression analysis was performed with 10-fold cross-validation

1  
2  
3 and 1000 bootstrap samples, as implemented in the R package *mami*. The results were presented  
4 as means of the lasso regression coefficients with 95% confidence intervals. ERI-2 was based on  
5 the relative ratios between the lasso regression coefficients.  
6

7  
8 *Internal validation:* The predictive abilities of the two risk indices, ERI-1 and ERI-2, were  
9 described by area under the receiver operating characteristic curve (AUC). Sensitivity and  
10 specificity for different cut-off values of the risk indices were calculated, as well as positive and  
11 negative predictive values (PPV and NPV). To take into account the likelihood of skewed  
12 representativeness of the patient sample towards high symptom burden,<sup>17</sup> we considered the  
13 following hypothetical prevalences of endometriosis in the general population: 0.1%, 0.5%, 1%,  
14 and 2%. Participants with complete data for the predictors included in ERI-1 and ERI-2 (155  
15 cases and 148 controls) were included in the analyses.  
16  
17

18 A significance level of 5% was used if not otherwise stated. All analyses were performed with  
19 IBM SPSS Statistics version 22, Stata/SE version 15, and R version 3.5.  
20  
21

## 22 **Patient and Public Involvement**

23 A representative of the Norwegian Endometriosis Association assessed readability and  
24 respondent burden of the questionnaire prior to survey administration. Patients were not  
25 consulted to interpret the results. Patients were not invited to contribute to the writing or editing  
26 of this document for readability or accuracy.  
27  
28

## 29 **Results**

### 30 **Basic characteristics of the participants**

31  
32 Basic characteristics of the participants are presented in tables 1, 2, and 3. All 157 participants  
33 with endometriosis reported surgically confirmed diagnosis. Of these, 123 reported previous or  
34 present affection of one or both ovaries, bladder, vagina, and/or bowels. To an open question  
35 inviting free description of previous treatment, 122 reported surgical treatment. Of these, 33  
36 reported specific surgical procedures including 18 hysterectomies, 12 oophorectomies (11  
37 unilateral, one bilateral), five cystectomies of endometriomas, and seven partial colectomies.  
38  
39  
40  
41  
42  
43  
44  
45  
46  
47  
48  
49  
50  
51  
52  
53  
54  
55  
56  
57  
58  
59  
60



Table 1 Recent characteristics of the participants

| Variable                                          | Endometriosis group<br>n = 157 |         | Control group<br>n = 156 |         | p-value             |
|---------------------------------------------------|--------------------------------|---------|--------------------------|---------|---------------------|
| Age (years), mean $\pm$ 1 SD                      | 35.2 $\pm$ 6.5                 |         | 32.6 $\pm$ 6.5           |         | <0.001 <sup>b</sup> |
| BMI (kg/m <sup>2</sup> ), mean $\pm$ 1 SD         | 24.8 $\pm$ 5.2                 |         | 23.4 $\pm$ 4.1           |         | 0.02 <sup>b</sup>   |
| Dysmenorrhea <sup>a</sup> , n (%)                 | 97                             | (71.9%) | 66                       | (43.4%) | <0.001 <sup>c</sup> |
| Pelvic pain <sup>a</sup> , n (%)                  | 129                            | (84.9%) | 29                       | (19.2%) | <0.001 <sup>c</sup> |
| Dysuria <sup>a</sup> , n (%)                      | 52                             | (33.8%) | 6                        | (3.9%)  | <0.001 <sup>c</sup> |
| Dyschezia <sup>a</sup> , n (%)                    | 83                             | (53.5%) | 17                       | (11.0%) | <0.001 <sup>c</sup> |
| Fatigue <sup>a</sup> , n (%)                      | 143                            | (91.1%) | 91                       | (59.1%) | <0.001 <sup>c</sup> |
| Nausea <sup>a</sup> , n (%)                       | 73                             | (46.5%) | 30                       | (19.2%) | <0.001 <sup>c</sup> |
| Irregular menstrual bleeding <sup>a</sup> , n (%) | 45                             | (32.4%) | 22                       | (14.7%) | <0.001 <sup>c</sup> |
| Irregular bowel movements <sup>a</sup> , n (%)    | 105                            | (68.2%) | 37                       | (24.2%) | <0.001 <sup>c</sup> |

<sup>a</sup> Experienced at any time during the 4 weeks prior to answering the questionnaire. <sup>b</sup> Independent samples t-test. <sup>c</sup> Pearson's chi-squared test. Because of missing values, the calculated percentages may not refer to the total number of participants.

Table 2 Adolescent characteristics and family history of the participants

| Variable                                                                 |                       | Endometriosis group<br>n = 157 |         | Control group<br>n = 156 |         | p-value             |
|--------------------------------------------------------------------------|-----------------------|--------------------------------|---------|--------------------------|---------|---------------------|
| <b>Age at menarche (years), mean ± 1 SD</b>                              |                       | 12.7 ± 1.5                     |         | 13.0 ± 1.6               |         | 0.11 <sup>a</sup>   |
|                                                                          | <i>Missing, n (%)</i> | 1                              | (0.6%)  | 7                        | (4.5%)  |                     |
| <b>Severe dysmenorrhea in adolescence, n (%)</b>                         | Never                 | 5                              | (3.2%)  | 30                       | (20.1%) | <0.001 <sup>b</sup> |
|                                                                          | Rarely                | 13                             | (8.3%)  | 36                       | (24.2%) |                     |
|                                                                          | Sometimes             | 31                             | (19.9%) | 43                       | (28.9%) |                     |
|                                                                          | Often                 | 45                             | (28.8%) | 21                       | (14.1%) |                     |
|                                                                          | Always                | 62                             | (39.7%) | 19                       | (12.8%) |                     |
|                                                                          | <i>Missing</i>        | 1                              | (0.6%)  | 7                        | (4.5%)  |                     |
| <b>Absenteeism from school due to dysmenorrhea, n (%)</b>                | Never                 | 28                             | (17.8%) | 99                       | (66.4%) | <0.001 <sup>b</sup> |
|                                                                          | Rarely                | 23                             | (14.6%) | 26                       | (17.4%) |                     |
|                                                                          | Sometimes             | 52                             | (33.1%) | 17                       | (11.4%) |                     |
|                                                                          | Often                 | 38                             | (24.2%) | 5                        | (3.4%)  |                     |
|                                                                          | Always                | 16                             | (10.2%) | 2                        | (1.3%)  |                     |
|                                                                          | <i>Missing</i>        | 0                              | (0%)    | 7                        | (4.5%)  |                     |
| <b>Use of painkillers for dysmenorrhea in adolescence, n (%)</b>         | Never                 | 20                             | (12.8%) | 56                       | (37.6%) | <0.001 <sup>b</sup> |
|                                                                          | Rarely                | 15                             | (9.6%)  | 30                       | (20.1%) |                     |
|                                                                          | Sometimes             | 36                             | (23.1%) | 40                       | (26.8%) |                     |
|                                                                          | Often                 | 39                             | (25.0%) | 10                       | (6.7%)  |                     |
|                                                                          | Always                | 46                             | (29.5%) | 13                       | (8.7%)  |                     |
|                                                                          | <i>Missing</i>        | 1                              | (0.6%)  | 7                        | (4.5%)  |                     |
| <b>Use of oral contraceptives for dysmenorrhea in adolescence, n (%)</b> | Yes                   | 60                             | (38.2%) | 17                       | (11.5%) | <0.001 <sup>c</sup> |
|                                                                          | No                    | 97                             | (61.8%) | 131                      | (88.5%) |                     |
|                                                                          | <i>Missing</i>        | 0                              | (0%)    | 8                        | (5.1%)  |                     |
| <b>Family history of endometriosis, n (%)</b>                            | Yes                   | 42                             | (26.8%) | 7                        | (4.5%)  | <0.001 <sup>c</sup> |
|                                                                          | Not yes <sup>d</sup>  | 115                            | (73.2%) | 149                      | (95.5%) |                     |

<sup>a</sup> Independent samples t-test. <sup>b</sup> Linear-by-linear association chi-squared test. <sup>c</sup> Pearson's chi-squared test. <sup>d</sup> Not yes: no/irrelevant/missing

Table 3 Further characteristics of the endometriosis group

|                                                             |               |
|-------------------------------------------------------------|---------------|
| <b>Diagnostic delay (years), mean <math>\pm</math> 1 SD</b> | 8.1 $\pm$ 6.5 |
| <b>Disease duration (years), mean <math>\pm</math> 1 SD</b> | 6.6 $\pm$ 5.0 |
| <b>Diagnosis confirmed by surgery</b>                       | 100%          |
| <b>Organ affected <sup>a</sup> (n = 148)</b>                |               |
| Only peritoneum, n (%)                                      | 10 (6.8%)     |
| Ovaries, n (%)                                              | 98 (66.2%)    |
| Bladder, n (%)                                              | 36 (24.3%)    |
| Vagina, n (%)                                               | 28 (18.9%)    |
| Bowels, n (%)                                               | 54 (36.5%)    |
| <b>Previous treatment <sup>b</sup> (n = 146)</b>            |               |
| Analgesic, n (%)                                            | 17 (11.6%)    |
| Hormonal, n (%)                                             | 85 (58.2%)    |
| Surgical, n (%)                                             | 122 (83.6%)   |
| <b>Present treatment <sup>b</sup> (n= 138)</b>              |               |
| No treatment, n (%)                                         | 45 (32.6%)    |
| Receiving treatment, n (%)                                  | 93 (67.4%)    |
| Analgesic, n (%)                                            | 28 (30.1%)    |
| Hormonal n (%)                                              | 73 (78.5%)    |
| Awaiting surgery, n (%)                                     | 4 (2.9%)      |

<sup>a</sup> Multiple choice question. <sup>b</sup> Open question inviting free description.

### Candidate predictors

Responses to the candidate predictors are presented in table 2. Blank responses were described as missing. In the control group, six participants skipped an entire page of the questionnaire (including the candidate predictors) most likely by error, and therefore had blank responses for all candidate predictors.

Regarding family history of endometriosis in the endometriosis group, 42 participants reported positive family history, 102 reported negative family history, five answered “irrelevant”, and eight did not answer at all (however, seven of these eight had written “I don’t know” as a comment in the answer field). Of the 42 who reported positive family history, 41 specified nature of kinship (reporting one to three relatives each). 19 reported a mother, 13 a sister, nine one or more aunts, four a grandmother, three a cousin, two parent’s cousin, one a niece, and one a great aunt. In total, 28 of 41 (68.3%) reported one or more first-degree relatives with endometriosis. In the control group, seven participants reported positive family history, 126 reported negative family history, eight answered “irrelevant”, and 15 did not answer at all. Of the seven who reported positive family history, six reported one or more sisters, one a mother, and one a cousin. All seven reported one or more first-degree relatives with endometriosis.

### Development of Endometriosis Risk Index variant 1 using logistic regression analysis

Based on univariable logistic regression analysis, *use of painkillers due to dysmenorrhea in adolescence, family history of endometriosis, use of oral contraceptives due to dysmenorrhea in adolescence, absenteeism from school due to dysmenorrhea, and severe dysmenorrhea in adolescence* were the strongest predictors of endometriosis (table 4). Multivariable logistic regression analysis with backward stepwise variable selection procedure resulted in two predictors: *absenteeism from school due to dysmenorrhea (A)*, and *family history of endometriosis (F)*. Based on the relative ratio between the beta coefficients (A : F ratio was 1.1 : 2.3, rounded to 1 : 2), the following risk index was developed and assigned scores from 0 to 6:

ERI-1 = A + 2F, where

- A = Absenteeism from school due to dysmenorrhea (never = 0 points, rarely = 1 point, sometimes = 2 points, often = 3 points, always = 4 points)
- F = Family history of endometriosis (yes = 1 point, not yes = 0 points).

### Development of Endometriosis Risk Index variant 2 using lasso regression analysis

Based on lasso regression analysis, four predictors were selected: *severe dysmenorrhea in adolescence, absenteeism from school due to dysmenorrhea, use of painkillers due to dysmenorrhea in adolescence* (the categories often or always), and *family history of endometriosis* (table 4). Based on the relative ratios between the means of the lasso regression coefficients, the following risk index was developed and assigned scores from 0 to 44:

ERI-2 = D + 6A + 2P + 14F, where

- D: Severe Dysmenorrhea in adolescence (never = 0 points, rarely = 1 point, sometimes = 2 points, often = 3 points, always = 4 points).
- A: Absenteeism from school due to dysmenorrhea (never = 0 points, rarely = 1 point, sometimes = 2 points, often = 3 points, always = 4 points).
- P: Use of Painkillers due to dysmenorrhea in adolescence (never/rarely/sometimes = 0 points, often/always = 1 point).
- F: Family history of endometriosis (yes = 1 point, not yes = 0 points).

Table 4 Logistic and lasso regression analyses of candidate predictors of endometriosis

| Candidate predictors                                | Univariable logistic regression |                 | Multivariable logistic regression |                 | Logistic regression with backward stepwise selection <sup>c</sup> |                 | Lasso regression |              |
|-----------------------------------------------------|---------------------------------|-----------------|-----------------------------------|-----------------|-------------------------------------------------------------------|-----------------|------------------|--------------|
|                                                     | B                               | OR (95%CI)      | B                                 | OR (95% CI)     | B                                                                 | OR (95% CI)     | B                | (95% CI)     |
| <i>Intercept</i>                                    |                                 |                 | -2.6                              | 0.1 (0.0, 0.9)  | -1.5                                                              | 0.2 (0.1, 0.3)  | -1.5             | (-4.3, -0.5) |
| Age at menarche (years)                             | -0.1                            | 0.9 (0.8, 1.0)  | 0.1                               | 1.1 (0.9, 1.3)  |                                                                   |                 |                  |              |
| Severe dysmenorrhea <sup>a</sup> (cont.)            | 0.8                             | 2.2 (1.8, 2.8)  | 0.2                               | 1.2 (0.9, 1.8)  |                                                                   |                 | 0.1              | (0.0, 0.5)   |
| Absenteeism from school <sup>b</sup> (cont.)        | 1.1                             | 3.0 (2.2, 3.9)  | 0.9                               | 2.5 (1.6, 3.7)  | 1.1                                                               | 3.0 (2.3, 4.1)  | 0.8              | (0.5, 1.2)   |
| Use of painkillers <sup>b</sup> (ref. never/rarely) |                                 |                 |                                   |                 |                                                                   |                 |                  |              |
| Sometimes                                           | 0.9                             | 2.3 (1.2, 4.5)  | -0.2                              | 0.8 (0.4, 2.0)  |                                                                   |                 |                  |              |
| Often/Always                                        | 2.3                             | 9.8 (5.2, 18.7) | 0.2                               | 1.3 (0.5, 3.5)  |                                                                   |                 | 0.3              | (0.0, 1.0)   |
| Use of oral contraceptives <sup>b</sup>             | 1.6                             | 4.8 (2.6, 8.8)  | 0.1                               | 1.1 (0.5, 2.6)  |                                                                   |                 |                  |              |
| Family history of endometriosis                     | 2.2                             | 8.7 (3.2, 23.5) | 2.2                               | 9.4 (2.9, 30.6) | 2.3                                                               | 9.5 (3.1, 29.2) | 1.7              | (1.0, 3.0)   |

Only participants with complete data for the candidate predictors (154 cases and 145 controls) were included in the analyses. OR: Odds ratio. CI: Confidence interval based on 1000 bootstrap samples. cont.: Continuous. <sup>a</sup> Experienced in adolescence. <sup>b</sup> Due to dysmenorrhea in adolescence. <sup>c</sup> Backward stepwise variable selection was performed using Wald test statistics  $p \leq 0.157$  as the criterion for inclusion.

Logistic and lasso regression analysis including participants with complete data for the candidate predictors, who only responded “Yes” or “No” to the candidate predictor *family history of endometriosis*” (142 cases and 130 controls), did not alter the findings (supplementary table).

### Internal validation

The AUC was 0.83 and 0.85 for ERI-1 and ERI-2, respectively. Sensitivities and specificities for different cut-off values for ERI-1 and ERI-2 are presented in table 5 and 6. Estimated specificities for ERI-1 with cut-off  $\geq 5$  (ERI-1  $\geq 5$ ) and ERI-2 with cut-off  $\geq 33$  (ERI-2  $\geq 33$ ) were 100%. As a true specificity of 100% is highly unlikely, we chose a value of 99.5% when calculating PPV for ERI-1  $\geq 5$  and ERI-2  $\geq 33$ .

For each hypothetical prevalence, PPV and NPV were calculated for ERI-1 cut-off values 2, 3, 4, and 5 (table 5), and for ERI-2 cut-off values 12, 19, 26, and 33 (table 6). The highest cut-off value provided the highest PPV. For the prevalences 0.1%, 0.5%, 1%, and 2%, both prediction models “ERI-1  $\geq 5$ ” (score range 0-6) and “ERI-2  $\geq 33$ ” (score range 0-44) ascertained endometriosis with PPV equal to 2.0%, 9.4%, 17.2%, and 29.6%, respectively. For both indices, PPV was low for the cut-off value that provided the highest sensitivity. NPV was at least 98% for all values considered (table 5 and 6). In the present dataset, 16 of 155 participants with endometriosis achieved ERI-1  $\geq 5$  and ERI-2  $\geq 33$ . Among participants without endometriosis, the highest achieved ERI-1 and ERI-2 scores were 4 and 32, respectively.

Table 5 Positive and negative predictive value for Endometriosis Risk Index variant 1 (score range 0-6) with cut-off values 2, 3, 4, and 5, for different possible prevalences of endometriosis

| Possible prevalences | ERI-1 $\geq$ 2                         |        | ERI-1 $\geq$ 3                         |       | ERI-1 $\geq$ 4                         |       | ERI-1 $\geq$ 5                          |       |
|----------------------|----------------------------------------|--------|----------------------------------------|-------|----------------------------------------|-------|-----------------------------------------|-------|
|                      | Sensitivity 76.8%<br>Specificity 79.7% |        | Sensitivity 45.2%<br>Specificity 92.6% |       | Sensitivity 24.5%<br>Specificity 98.0% |       | Sensitivity 10.3%<br>Specificity 100.0% |       |
|                      | PPV                                    | NPV    | PPV                                    | NPV   | PPV                                    | NPV   | PPV                                     | NPV   |
| 2.0%                 | 7.2%                                   | 99.4%  | 11.1%                                  | 98.8% | 20.0%                                  | 98.5% | 29.6% <sup>a</sup>                      | 98.2% |
| 1.0%                 | 3.7%                                   | 99.7%  | 5.8%                                   | 99.4% | 11.0%                                  | 99.2% | 17.2% <sup>a</sup>                      | 99.1% |
| 0.5%                 | 1.9%                                   | 99.9%  | 3.0%                                   | 99.7% | 5.8%                                   | 99.6% | 9.4% <sup>a</sup>                       | 99.5% |
| 0.1%                 | 0.4%                                   | 100.0% | 0.6%                                   | 99.9% | 1.2%                                   | 99.9% | 2.0% <sup>a</sup>                       | 99.9% |

Only participants with complete data for the predictors included in Endometriosis Risk Index variant 1 and 2 (155 cases and 148 controls) were included in the analyses. ERI-1: Endometriosis Risk Index variant 1. PPV: Positive predictive value. NPV: Negative predictive value. <sup>a</sup> PPV for ERI-1 cut-off  $\geq$  5 was calculated using specificity 99.5%, not 100.0%

Table 6 Positive and negative predictive value for Endometriosis Risk Index variant 2 (score range 0-44) with cut-off values 12, 19, 26, and 33, for different possible prevalences of endometriosis

| Possible prevalences | ERI-2 $\geq$ 12                        |        | ERI-2 $\geq$ 19                        |       | ERI-2 $\geq$ 26                        |       | ERI-2 $\geq$ 33                         |       |
|----------------------|----------------------------------------|--------|----------------------------------------|-------|----------------------------------------|-------|-----------------------------------------|-------|
|                      | Sensitivity 78.1%<br>Specificity 79.7% |        | Sensitivity 45.2%<br>Specificity 92.6% |       | Sensitivity 24.5%<br>Specificity 98.0% |       | Sensitivity 10.3%<br>Specificity 100.0% |       |
|                      | PPV                                    | NPV    | PPV                                    | NPV   | PPV                                    | NPV   | PPV                                     | NPV   |
| 2.0%                 | 7.3%                                   | 99.4%  | 11.1%                                  | 98.8% | 20.0%                                  | 98.5% | 29.6% <sup>a</sup>                      | 98.2% |
| 1.0%                 | 3.7%                                   | 99.7%  | 5.8%                                   | 99.4% | 11.0%                                  | 99.2% | 17.2% <sup>a</sup>                      | 99.1% |
| 0.5%                 | 1.9%                                   | 99.9%  | 3.0%                                   | 99.7% | 5.8%                                   | 99.6% | 9.4% <sup>a</sup>                       | 99.5% |
| 0.1%                 | 0.4%                                   | 100.0% | 0.6%                                   | 99.9% | 1.2%                                   | 99.9% | 2.0% <sup>a</sup>                       | 99.9% |

Only participants with complete data for the predictors included in Endometriosis Risk Index variant 1 and 2 (155 cases and 148 controls) were included in the analyses. ERI-2: Endometriosis Risk Index variant 2. PPV: Positive predictive value. NPV: Negative predictive value. <sup>a</sup> PPV for ERI-2 cut-off  $\geq$  33 was calculated using specificity 99.5%, not 100.0%

## Discussion

### Statement of principal findings

In the present study, regression analysis was used to develop two endometriosis risk indices. The predictors *absenteeism from school due to dysmenorrhea* and *family history of endometriosis* demonstrated the strongest association with disease. Endometriosis Risk Index variant 1 (ERI-1) included these two predictors only. Endometriosis Risk Index variant 2 (ERI-2) included two more: *severe dysmenorrhea in adolescence* and *use of painkillers due to dysmenorrhea in adolescence*. These two predictors had the lowest weight among the predictors included in ERI-2. For the hypothetical prevalences of endometriosis in the general population 0.1%, 0.5%, 1%, and 2%, both prediction models “ERI-1  $\geq$  5” (score range 0-6) and “ERI-2  $\geq$  33” (score range 0-44) ascertained endometriosis with PPV equal to 2.0%, 9.4%, 17.2%, and 29.6%, respectively, and NPV was at least 98% for all values considered. Thus, no apparent additional value was

1  
2  
3 observed for ERI-2 relative to ERI-1. However, this issue should be investigated in an external  
4 validation study. For the predictor *family history of endometriosis*, comments from participants  
5 suggest that “I don’t know” should be included as a response category (in addition to “Yes”,  
6 “No”, and “Irrelevant”) in future studies.  
7

### 8 9 **Strengths and weaknesses of the study**

10 A major strength of the present study is that it is the first to identify predictors of endometriosis  
11 which may be used in primary care. When developing prediction models, high positive  
12 predictive value (PPV) is preferable to high sensitivity and specificity. Thus, cut-off values for  
13 the risk indices providing the highest PPV were chosen. Depending on the prevalence, the  
14 prediction models may identify women at high risk of developing endometriosis with PPVs  
15 comparable to that of mammography screening, where PPVs close to 15% are common.<sup>18</sup>  
16 However, a sensitivity close to 10% is lower than we would prefer. Still, our patient sample has  
17 previously been demonstrated to carry a high disease burden, with marked pain and low health-  
18 related quality of life, comparable to or worse than women with rheumatoid arthritis, but with the  
19 disease hitting them at a much younger age.<sup>17</sup> Thus, we have a patient sample representing a  
20 subtype of endometriosis that would undoubtedly benefit from early diagnosis and treatment.  
21 Hence, a screening tool with a sensitivity of 10% seems much better than the alternative of no  
22 screening tool. Cut-offs giving a sensitivity and specificity of ~80%, provided an unacceptable  
23 PPV of ~3%.  
24  
25  
26

27 Our study has several weaknesses. First, we did not have access to medical records. Thus,  
28 severity of endometriosis could not be assessed. A second weakness is that we cannot exclude  
29 the possibility of recall bias. Women with endometriosis may be more liable to recall symptoms  
30 suggestive of endometriosis experienced in adolescence compared with women without  
31 endometriosis. A third weakness is the low response rate from the general population, following  
32 an overall international trend of declining response rates to postal surveys.<sup>19</sup> Thus, the control  
33 group may not be completely randomly selected even though random procedures were used for  
34 selection. However, the prevalences of *absenteeism from school due to dysmenorrhea* and *family*  
35 *history of endometriosis* in the control group in the present study, were comparable to those  
36 found in a Finnish survey involving 1103 adolescent girls from the general population, in which  
37 2.7% reported having a first degree relative with endometriosis, and 5% reported regular  
38 absenteeism from school or voluntary activities because of painful menstruation.<sup>20</sup>  
39  
40  
41

### 42 **Comparison with other studies**

43 Previous studies on screening tool development have not included control groups from the  
44 general population and have not been intended for use in primary care settings, making  
45 comparisons of findings difficult.<sup>12 13 21-23</sup> In general, reporting of pain, such as frequency of  
46 dysmenorrhea, is subject to substantial individual variation and expected to be of limited  
47 predictive value. However, interference of pain with daily life, such as absenteeism from school  
48 due to dysmenorrhea, is less common and likely less subject to individual variation. The choice  
49 of the response options “never”, “rarely”, “sometimes”, “often”, and “always” to the question on  
50 frequency of absenteeism from school, although seldom used in other studies, has most likely  
51 been suitable. Endometriosis has an estimated total heritability of about 50%.<sup>24 25</sup> It is therefore  
52 not surprising that a positive family history of endometriosis is required for both prediction  
53 models to identify women at high risk of developing endometriosis.  
54  
55  
56  
57  
58  
59  
60

1  
2  
3  
4 The predictors identified in the current study are in line with a French study, however more so  
5 for advanced endometriosis than for endometriosis in general.<sup>26</sup> In a cross-sectional study  
6 comparing adolescent markers among women with endometriosis, women with deeply  
7 infiltrating endometriosis were found to have a more positive family history of endometriosis  
8 (OR 3.2) and higher absenteeism from school during menstruation (OR 1.7), than women with  
9 superficial peritoneal endometriosis and/or ovarian endometriomas.<sup>26</sup> In a genome-wide  
10 association study regarding heredity of endometriosis, moderate and severe endometriosis  
11 showed greater genetic burden than minimal or mild endometriosis.<sup>27</sup> Thus, our models may be  
12 more predictive of advanced endometriosis than of endometriosis in general. The prevalence of  
13 deep endometriosis is assumed to be ~2%,<sup>2,28</sup> which may be a bit overstated according to some  
14 prevalence studies.<sup>29-32</sup> Thus, the chosen range of hypothetical prevalences in the present study  
15 seems appropriate.  
16  
17  
18

### 19 **Future research**

20 More studies on screening tool development for endometriosis including control groups from the  
21 general population are needed. Register studies should be encouraged. However, newer  
22 candidate predictors such as absenteeism from school due to dysmenorrhea with suitable  
23 response options may not always be available. In view of the diversity of endometriosis, different  
24 subtypes may require different prediction models.  
25  
26

### 27 **Conclusions and clinical implications**

28 The developed prediction models need to be validated in future studies before use. Meanwhile,  
29 endometriosis should be considered a differential diagnosis in women with frequent absenteeism  
30 from school or work due to dysmenorrhea and positive family history of endometriosis.  
31 Persevering or increasing interference of pain with daily life should prompt referral to secondary  
32 or tertiary care clinics experienced in handling endometriosis patients.  
33  
34  
35

### 36 **Acknowledgements**

37  
38  
39 We gratefully acknowledge the contribution of Karen Bertelsen of the Norwegian Endometriosis  
40 Association and the association itself.  
41  
42  
43

### 44 **Contributors**

45  
46 Study concept and design: NJV, RSF, LS. Acquisition of data: NJV. Analysis and interpretation  
47 of data: NJV, RSF, EQ, TGT, LS. Drafting of manuscript: NJV, RSF, LS. The final manuscript  
48 was critically revised and approved by all authors.  
49  
50  
51

### 52 **Funding**

53  
54 The present study was funded by the University of Oslo.  
55  
56  
57  
58  
59  
60



## Competing interests

None declared.

## Ethics approval

The study was approved by the Regional Committee for Medical and Health Research Ethics, division south-eastern Norway (trial registration number: 2011/2213/Regional Committee for Medical and Health Research Ethics, division south-eastern Norway B).

## Data Sharing Statement

The data used in the present study is part of a larger dataset. Due to ongoing data analysis, the data used in the present study will not be available until all data analysis is completed. The corresponding author can be contacted for details.

## Dissemination declaration

We aim to disseminate the results in the Norwegian Endometriosis Association newsletter. If the prediction models are validated, primary care physicians will be informed through national health care and primary care physician websites. School nurses will be informed through school nurse networks, including presentation at the annual national school nurse conference.

## References

1. Fuldeore MJ, Soliman AM. Prevalence and Symptomatic Burden of Diagnosed Endometriosis in the United States: National Estimates from a Cross-Sectional Survey of 59,411 Women. *Gynecol Obstet Invest* 2017;82(5):453-61. doi: 10.1159/000452660 [published Online First: 2016/11/08]
2. Zondervan KT, Becker CM, Koga K, et al. Endometriosis. *Nat Rev Dis Primers* 2018;4(1):9. doi: 10.1038/s41572-018-0008-5 [published Online First: 2018/07/22]
3. Vercellini P, Vigano P, Somigliana E, et al. Endometriosis: pathogenesis and treatment. *Nat Rev Endocrinol* 2014;10(5):261-75. doi: 10.1038/nrendo.2013.255
4. Giudice LC. Clinical practice. Endometriosis. *N Engl J Med* 2010;362(25):2389-98. doi: 10.1056/NEJMcp1000274
5. Nnoaham KE, Hummelshoj L, Webster P, et al. Impact of endometriosis on quality of life and work productivity: a multicenter study across ten countries. *Fertil Steril* 2011;96(2):366-73. doi: 10.1016/j.fertnstert.2011.05.090
6. De Graaff AA, D'Hooghe TM, Dunselman GA, et al. The significant effect of endometriosis on physical, mental and social wellbeing: results from an international cross-sectional survey. *Hum Reprod* 2013;28(10):2677-85. doi: 10.1093/humrep/det284

- 1  
2  
3 7. Nisenblat V, Prentice L, Bossuyt PM, et al. Combination of the non-invasive tests for the  
4 diagnosis of endometriosis. *Cochrane Database Syst Rev* 2016;7:CD012281. doi:  
5 10.1002/14651858.CD012281
- 6  
7 8. Husby GK, Haugen RS, Moen MH. Diagnostic delay in women with pain and endometriosis.  
8 *Acta Obstet Gynecol Scand* 2003;82(7):649-53.
- 9  
10 9. Matsuzaki S, Canis M, Pouly JL, et al. Relationship between delay of surgical diagnosis and  
11 severity of disease in patients with symptomatic deep infiltrating endometriosis. *Fertil*  
12 *Steril* 2006;86(5):1314-6; discussion 17. doi: 10.1016/j.fertnstert.2006.03.048
- 13  
14 10. Hudelist G, Fritzer N, Thomas A, et al. Diagnostic delay for endometriosis in Austria and  
15 Germany: causes and possible consequences. *Hum Reprod* 2012;27(12):3412-6. doi:  
16 10.1093/humrep/des316
- 17  
18 11. Staal AH, van der Zanden M, Nap AW. Diagnostic Delay of Endometriosis in the  
19 Netherlands. *Gynecol Obstet Invest* 2016;81(4):321-4. doi: 10.1159/000441911
- 20  
21 12. Calhaz-Jorge C, Mol BW, Nunes J, et al. Clinical predictive factors for endometriosis in a  
22 Portuguese infertile population. *Hum Reprod* 2004;19(9):2126-31. doi:  
23 10.1093/humrep/deh374
- 24  
25 13. Nnoaham KE, Hummelshoj L, Kennedy SH, et al. Developing symptom-based predictive  
26 models of endometriosis as a clinical screening tool: results from a multicenter study.  
27 *Fertil Steril* 2012;98(3):692-701 e5. doi: 10.1016/j.fertnstert.2012.04.022
- 28  
29 14. Surrey E, Carter CM, Soliman AM, et al. Patient-completed or symptom-based screening  
30 tools for endometriosis: a scoping review. *Arch Gynecol Obstet* 2017;296(2):153-65. doi:  
31 10.1007/s00404-017-4406-9
- 32  
33 15. Bakken A. Ungdata. Nasjonale resultater 2018, NOVA Rapport 8/18. Oslo: Norwegian  
34 Social Research (NOVA), 2018.
- 35  
36 16. Collins GS, Reitsma JB, Altman DG, et al. Transparent reporting of a multivariable  
37 prediction model for individual prognosis or diagnosis (TRIPOD): the TRIPOD  
38 statement. *BMJ* 2015;350:g7594. doi: 10.1136/bmj.g7594 [published Online First:  
39 2015/01/09]
- 40  
41 17. Verket NJ, Uhlig T, Sandvik L, et al. Health-related quality of life in women with  
42 endometriosis, compared with the general population and women with rheumatoid  
43 arthritis. *Acta Obstet Gynecol Scand* 2018;97(11):1339-48. doi: 10.1111/aogs.13427  
44 [published Online First: 2018/07/15]
- 45  
46 18. Domingo L, Hofvind S, Hubbard RA, et al. Cross-national comparison of screening  
47 mammography accuracy measures in U.S., Norway, and Spain. *Eur Radiol*  
48 2016;26(8):2520-8. doi: 10.1007/s00330-015-4074-8
- 49  
50 19. Morton LM, Cahill J, Hartge P. Reporting participation in epidemiologic studies: a survey of  
51 practice. *Am J Epidemiol* 2006;163(3):197-203. doi: 10.1093/aje/kwj036 [published  
52 Online First: 2005/12/13]
- 53  
54 20. Suvitie PA, Hallamaa MK, Matomaki JM, et al. Prevalence of Pain Symptoms Suggestive of  
55 Endometriosis Among Finnish Adolescent Girls (TEENMAPS Study). *J Pediatr Adolesc*  
56 *Gynecol* 2016;29(2):97-103. doi: 10.1016/j.jpag.2015.07.001
- 57  
58 21. Chapron C, Barakat H, Fritel X, et al. Presurgical diagnosis of posterior deep infiltrating  
59 endometriosis based on a standardized questionnaire. *Hum Reprod* 2005;20(2):507-13.  
60 doi: 10.1093/humrep/deh627

22. Ballard K, Lane H, Hudelist G, et al. Can specific pain symptoms help in the diagnosis of endometriosis? A cohort study of women with chronic pelvic pain. *Fertil Steril* 2010;94(1):20-7. doi: 10.1016/j.fertnstert.2009.01.164
23. Lafay Pillet MC, Huchon C, Santulli P, et al. A clinical score can predict associated deep infiltrating endometriosis before surgery for an endometrioma. *Hum Reprod* 2014;29(8):1666-76. doi: 10.1093/humrep/deu128
24. Treloar SA, O'Connor DT, O'Connor VM, et al. Genetic influences on endometriosis in an Australian twin sample. *sueT@qimr.edu.au. Fertil Steril* 1999;71(4):701-10.
25. Saha R, Pettersson HJ, Svedberg P, et al. Heritability of endometriosis. *Fertil Steril* 2015;104(4):947-52. doi: 10.1016/j.fertnstert.2015.06.035 [published Online First: 2015/07/26]
26. Chapron C, Lafay-Pillet MC, Monceau E, et al. Questioning patients about their adolescent history can identify markers associated with deep infiltrating endometriosis. *Fertil Steril* 2011;95(3):877-81. doi: 10.1016/j.fertnstert.2010.10.027
27. Sapkota Y, Attia J, Gordon SD, et al. Genetic burden associated with varying degrees of disease severity in endometriosis. *Mol Hum Reprod* 2015;21(7):594-602. doi: 10.1093/molehr/gav021
28. Koninckx PR, Ussia A, Adamyan L, et al. Deep endometriosis: definition, diagnosis, and treatment. *Fertil Steril* 2012;98(3):564-71. doi: 10.1016/j.fertnstert.2012.07.1061
29. Moen MH, Schei B. Epidemiology of endometriosis in a Norwegian county. *Acta Obstet Gynecol Scand* 1997;76(6):559-62.
30. Abbas S, Ihle P, Koster I, et al. Prevalence and incidence of diagnosed endometriosis and risk of endometriosis in patients with endometriosis-related symptoms: findings from a statutory health insurance-based cohort in Germany. *Eur J Obstet Gynecol Reprod Biol* 2012;160(1):79-83. doi: 10.1016/j.ejogrb.2011.09.041
31. von Theobald P, Cottenet J, Iacobelli S, et al. Epidemiology of Endometriosis in France: A Large, Nation-Wide Study Based on Hospital Discharge Data. *Biomed Res Int* 2016;2016:3260952. doi: 10.1155/2016/3260952
32. Eisenberg VH, Weil C, Chodick G, et al. Epidemiology of endometriosis: a large population-based database study from a healthcare provider with 2 million members. *BJOG* 2018;125(1):55-62. doi: 10.1111/1471-0528.14711 [published Online First: 2017/04/27]

## Supplementary flow chart



# Supplementary table

## Development of a prediction model to aid primary care physicians in early identification of women at high risk of developing endometriosis: a cross-sectional study

Verket et al.

**Supplementary table:** Logistic and lasso regression analyses of candidate predictors of endometriosis among observation with complete data for the candidate predictors, who only responded “Yes” or “No” to the candidate predictor family history of endometriosis” (142 cases and 130 controls)

| Candidate predictors                                | Univariable logistic regression |                  | Multivariable logistic regression |                 | Logistic regression with backward stepwise selection <sup>c</sup> |                 | Lasso regression |              |
|-----------------------------------------------------|---------------------------------|------------------|-----------------------------------|-----------------|-------------------------------------------------------------------|-----------------|------------------|--------------|
|                                                     | B                               | OR (95% CI)      | B                                 | OR (95% CI)     | B                                                                 | OR (95% CI)     | B                | (95% CI)     |
| <i>Intercept</i>                                    |                                 |                  | -2.5                              | 0.1 (0.0, 1.4)  | -1.5                                                              | 0.2 (0.1, 0.3)  | -1.5             | (-4.1, -0.5) |
| Age at menarche (years)                             | -0.2                            | 0.9 (0.8, 1.0)   | 0.1                               | 1.1 (0.9, 1.3)  |                                                                   |                 |                  |              |
| Severe dysmenorrhea <sup>a</sup> (cont.)            | 0.8                             | 2.2 (1.8, 2.8)   | 0.2                               | 1.2 (0.8, 1.8)  |                                                                   |                 | 0.1              | (0.0, 0.5)   |
| Absenteeism from school <sup>b</sup> (cont.)        | 1.1                             | 2.9 (2.2, 3.8)   | 0.9                               | 2.4 (1.6, 3.6)  | 1.1                                                               | 3.0 (2.2, 4.0)  | 0.8              | (0.5, 1.2)   |
| Use of painkillers <sup>b</sup> (ref. never/rarely) |                                 |                  |                                   |                 |                                                                   |                 |                  |              |
| Sometimes                                           | 0.8                             | 2.3 (1.2, 4.2)   | -0.1                              | 0.9 (0.4, 2.0)  |                                                                   |                 |                  |              |
| Often/Always                                        | 2.3                             | 10.5 (5.4, 20.3) | 0.4                               | 1.5 (0.5, 4.2)  |                                                                   |                 | 0.4              | (0.0, 1.1)   |
| Use of oral contraceptives <sup>b</sup>             | 1.5                             | 4.5 (2.4, 8.4)   | -0.1                              | 0.9 (0.4, 2.2)  |                                                                   |                 |                  |              |
| Family history of endometriosis                     | 2.2                             | 8.7 (3.5, 21.2)  | 2.3                               | 9.5 (3.5, 26.1) | 2.3                                                               | 9.6 (3.6, 26.0) | 1.8              | (1.0, 3.1)   |

OR: Odds ratio. CI: Confidence interval based on 1000 bootstrap samples. cont.: Continuous. <sup>a</sup> Experienced in adolescence. <sup>b</sup> Due to dysmenorrhea in adolescence. <sup>c</sup> Backward stepwise variable selection was performed using Wald test statistics  $p \leq 0.157$  as the criterion for inclusion.

## TRIPOD Checklist: Prediction Model Development

| Section/Topic                | Item | Checklist Item                                                                                                                                                                                        | Page  |
|------------------------------|------|-------------------------------------------------------------------------------------------------------------------------------------------------------------------------------------------------------|-------|
| <b>Title and abstract</b>    |      |                                                                                                                                                                                                       |       |
| Title                        | 1    | Identify the study as developing and/or validating a multivariable prediction model, the target population, and the outcome to be predicted.                                                          | 1     |
| Abstract                     | 2    | Provide a summary of objectives, study design, setting, participants, sample size, predictors, outcome, statistical analysis, results, and conclusions.                                               | 2     |
| <b>Introduction</b>          |      |                                                                                                                                                                                                       |       |
| Background and objectives    | 3a   | Explain the medical context (including whether diagnostic or prognostic) and rationale for developing or validating the multivariable prediction model, including references to existing models.      | 4     |
|                              | 3b   | Specify the objectives, including whether the study describes the development or validation of the model or both.                                                                                     | 4     |
| <b>Methods</b>               |      |                                                                                                                                                                                                       |       |
| Source of data               | 4a   | Describe the study design or source of data (e.g., randomized trial, cohort, or registry data), separately for the development and validation data sets, if applicable.                               | 4     |
|                              | 4b   | Specify the key study dates, including start of accrual; end of accrual; and, if applicable, end of follow-up.                                                                                        | 4     |
| Participants                 | 5a   | Specify key elements of the study setting (e.g., primary care, secondary care, general population) including number and location of centres.                                                          | 4-5   |
|                              | 5b   | Describe eligibility criteria for participants.                                                                                                                                                       | 4-5   |
|                              | 5c   | Give details of treatments received, if relevant.                                                                                                                                                     |       |
| Outcome                      | 6a   | Clearly define the outcome that is predicted by the prediction model, including how and when assessed.                                                                                                | 4-6   |
|                              | 6b   | Report any actions to blind assessment of the outcome to be predicted.                                                                                                                                | NR    |
| Predictors                   | 7a   | Clearly define all predictors used in developing or validating the multivariable prediction model, including how and when they were measured.                                                         | 5     |
|                              | 7b   | Report any actions to blind assessment of predictors for the outcome and other predictors.                                                                                                            | NR    |
| Sample size                  | 8    | Explain how the study size was arrived at.                                                                                                                                                            | NA    |
| Missing data                 | 9    | Describe how missing data were handled (e.g., complete-case analysis, single imputation, multiple imputation) with details of any imputation method.                                                  | 6     |
| Statistical analysis methods | 10a  | Describe how predictors were handled in the analyses.                                                                                                                                                 | 5-6   |
|                              | 10b  | Specify type of model, all model-building procedures (including any predictor selection), and method for internal validation.                                                                         | 5-6   |
|                              | 10d  | Specify all measures used to assess model performance and, if relevant, to compare multiple models.                                                                                                   | 5-6   |
| Risk groups                  | 11   | Provide details on how risk groups were created, if done.                                                                                                                                             | NR    |
| <b>Results</b>               |      |                                                                                                                                                                                                       |       |
| Participants                 | 13a  | Describe the flow of participants through the study, including the number of participants with and without the outcome and, if applicable, a summary of the follow-up time. A diagram may be helpful. | 6-8   |
|                              | 13b  | Describe the characteristics of the participants (basic demographics, clinical features, available predictors), including the number of participants with missing data for predictors and outcome.    | 6-8   |
| Model development            | 14a  | Specify the number of participants and outcome events in each analysis.                                                                                                                               | 8-9   |
|                              | 14b  | If done, report the unadjusted association between each candidate predictor and outcome.                                                                                                              | 9     |
| Model specification          | 15a  | Present the full prediction model to allow predictions for individuals (i.e., all regression coefficients, and model intercept or baseline survival at a given time point).                           | 8-9   |
|                              | 15b  | Explain how to use the prediction model.                                                                                                                                                              | 8-9   |
| Model performance            | 16   | Report performance measures (with CIs) for the prediction model.                                                                                                                                      | 10-11 |
| <b>Discussion</b>            |      |                                                                                                                                                                                                       |       |
| Limitations                  | 18   | Discuss any limitations of the study (such as nonrepresentative sample, few events per predictor, missing data).                                                                                      | 11-12 |
| Interpretation               | 19b  | Give an overall interpretation of the results, considering objectives, limitations, and results from similar studies, and other relevant evidence.                                                    | 11-13 |
| Implications                 | 20   | Discuss the potential clinical use of the model and implications for future research.                                                                                                                 | 12-13 |
| <b>Other information</b>     |      |                                                                                                                                                                                                       |       |
| Supplementary information    | 21   | Provide information about the availability of supplementary resources, such as study protocol, Web calculator, and data sets.                                                                         | NR    |
| Funding                      | 22   | Give the source of funding and the role of the funders for the present study.                                                                                                                         | 13    |

We recommend using the TRIPOD Checklist in conjunction with the TRIPOD Explanation and Elaboration document.
