# Supplementary figures and images for: Development of a prediction model to aid primary care physicians in early identification of women at high risk of developing endometriosis: cross-sectional study
Source: PubMed Central journal article supplement — BMJ Open. 2019 Dec 4;9(12):e030346. doi: 10.1136/bmjopen-2019-030346 (PMC6924695; doi:10.1136/bmjopen-2019-030346), 2019-12-04

## Supplementary flow chart

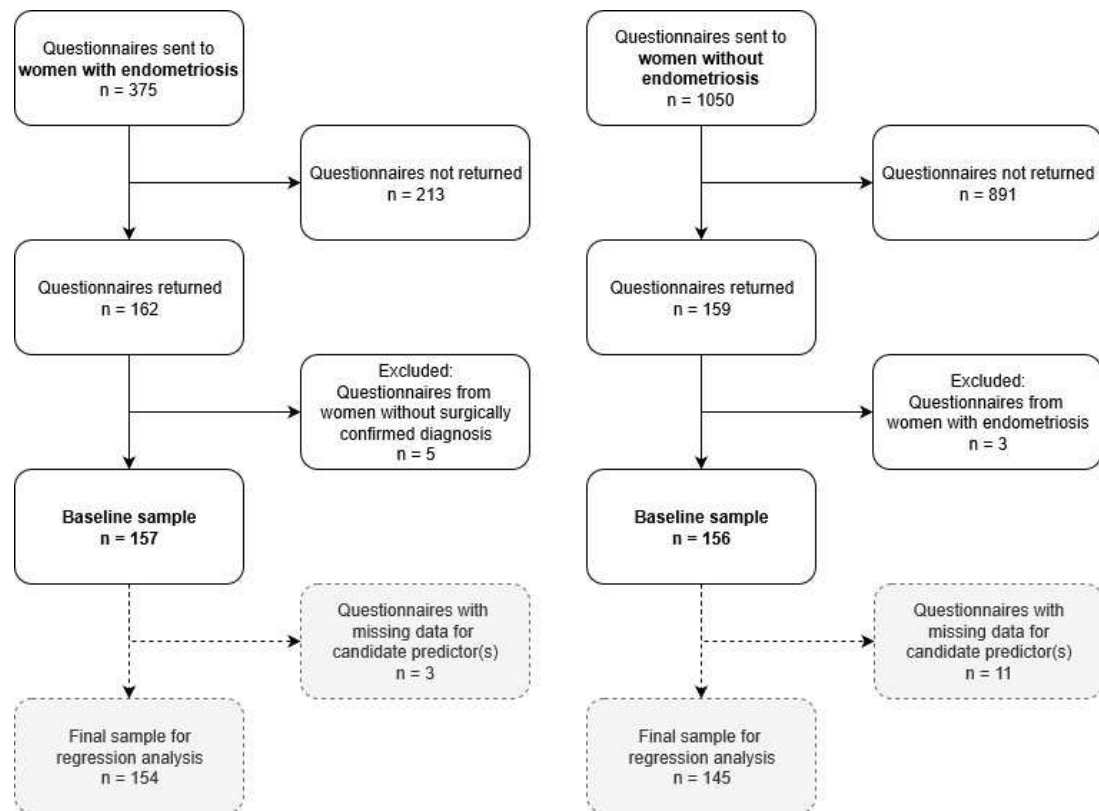

Supplement: bmjopen-2019-030346supp001.pdf [file bmjopen-2019-030346supp001.pdf]
